# Supplementary material for: ent-Pimarane and ent-Kaurane Diterpenes from Aldama discolor (Asteraceae) and Their Antiprotozoal Activity
Source: MDPI journal article supplement (doi:10.3390/molecules21091237), 2016-09-15
Supplement: s2 [file s2]

# Supplementary Materials: *ent*-Pimarane and *ent*-Kaurane Diterpenes from *Aldama discolor* (Asteraceae) and Their Antiprotozoal Activity

Mauro S. Nogueira, Fernando B. Da Costa, Reto Brun, Marcel Kaiser and Thomas J. Schmidt

## 1. Supporting Information

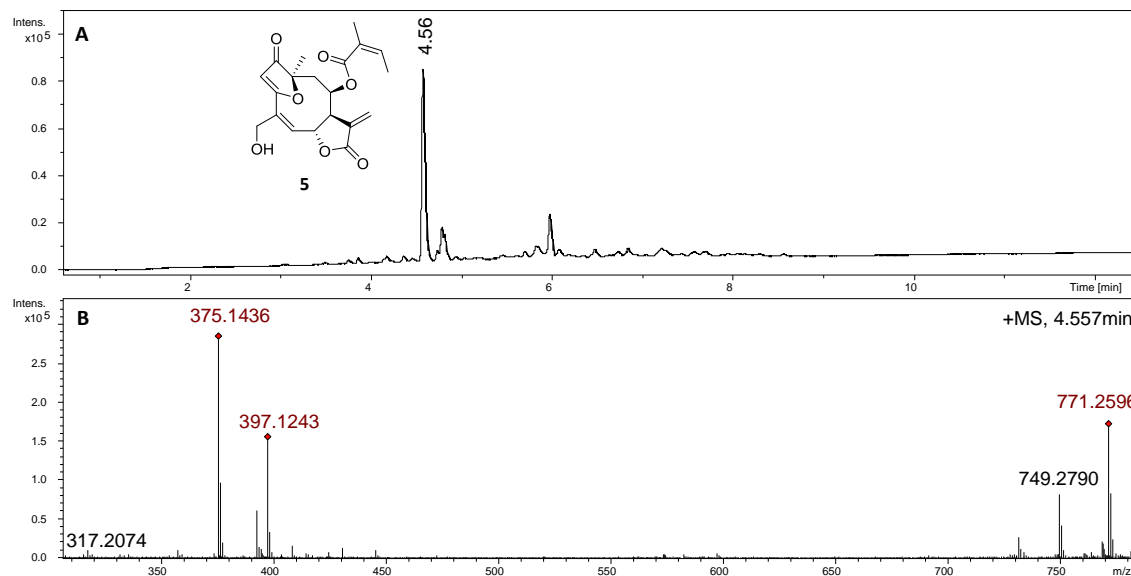

**Figure S1.** (A) LC-MS-chromatogram of the last fraction (elution with EtOAc) of the CC on silica gel of the dichloromethane extract of *A. discolor* leaves; (B) +ESI-MS of its major compound, budlein A.  $[M + H]^+$ : 375.1436 ( $C_{20}H_{23}O_7$ ).

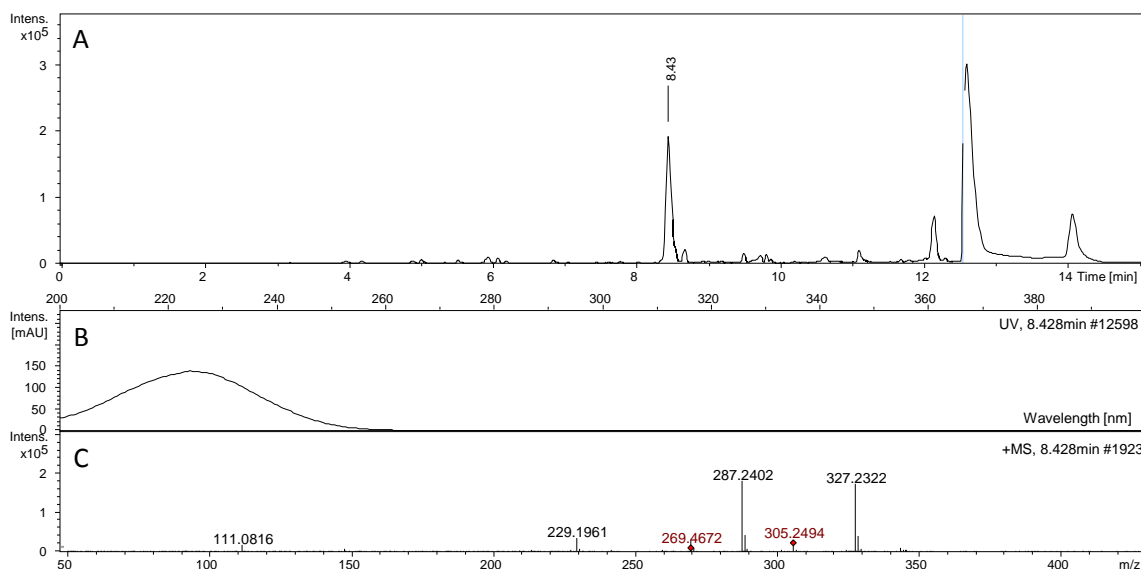

**Figure S2.** +ESI-QqTOF-MS chromatogram (A); UV spectrum (B); +ESI-MS (C) of compound 1,  $[M + H]^+$ : 305.2494 ( $C_{20}H_{33}O_2$ ) and  $[M + Na]^+$ : 327.2322 ( $C_{20}H_{32}O_2Na$ ). Internal calibrant sodium formate: 12.6 min.

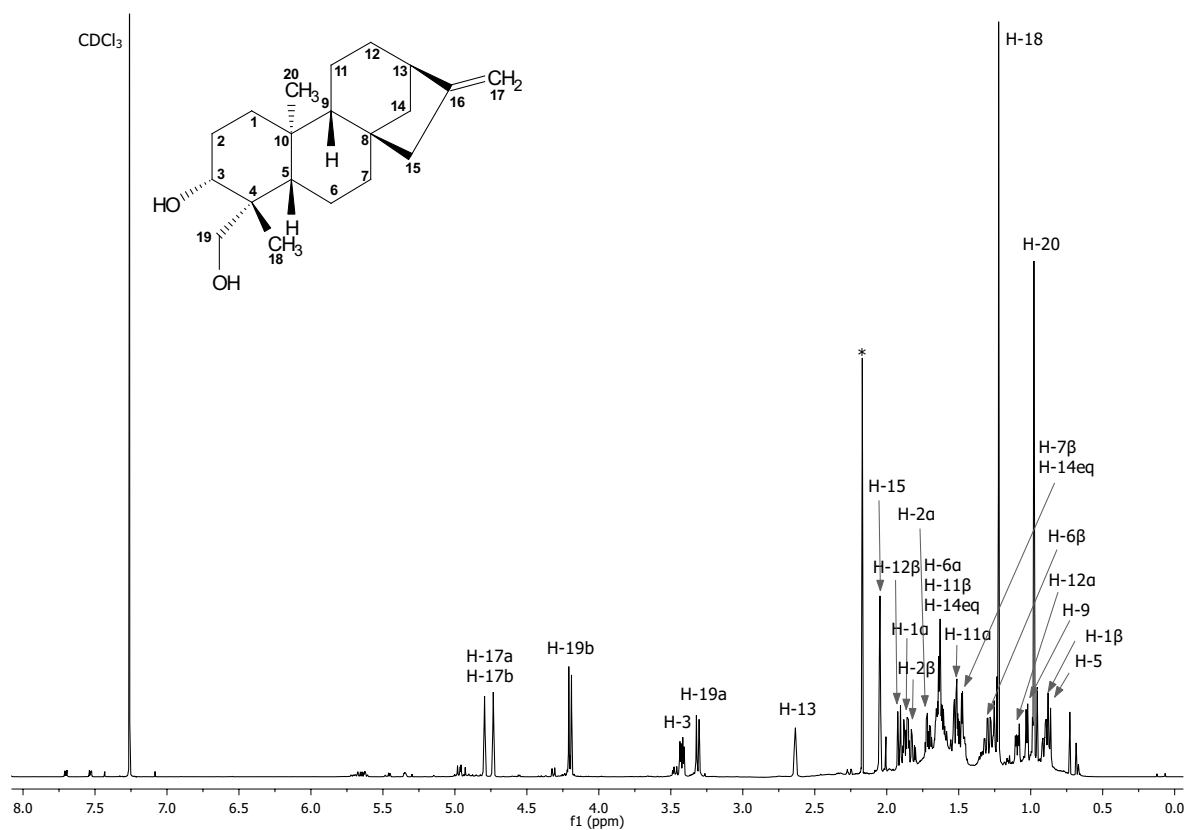

Figure S3.  $^1\text{H}$  NMR spectrum of compound 1 ( $\text{CDCl}_3$ , 600 MHz). \*- $\text{CH}_3$  protons from acetone.

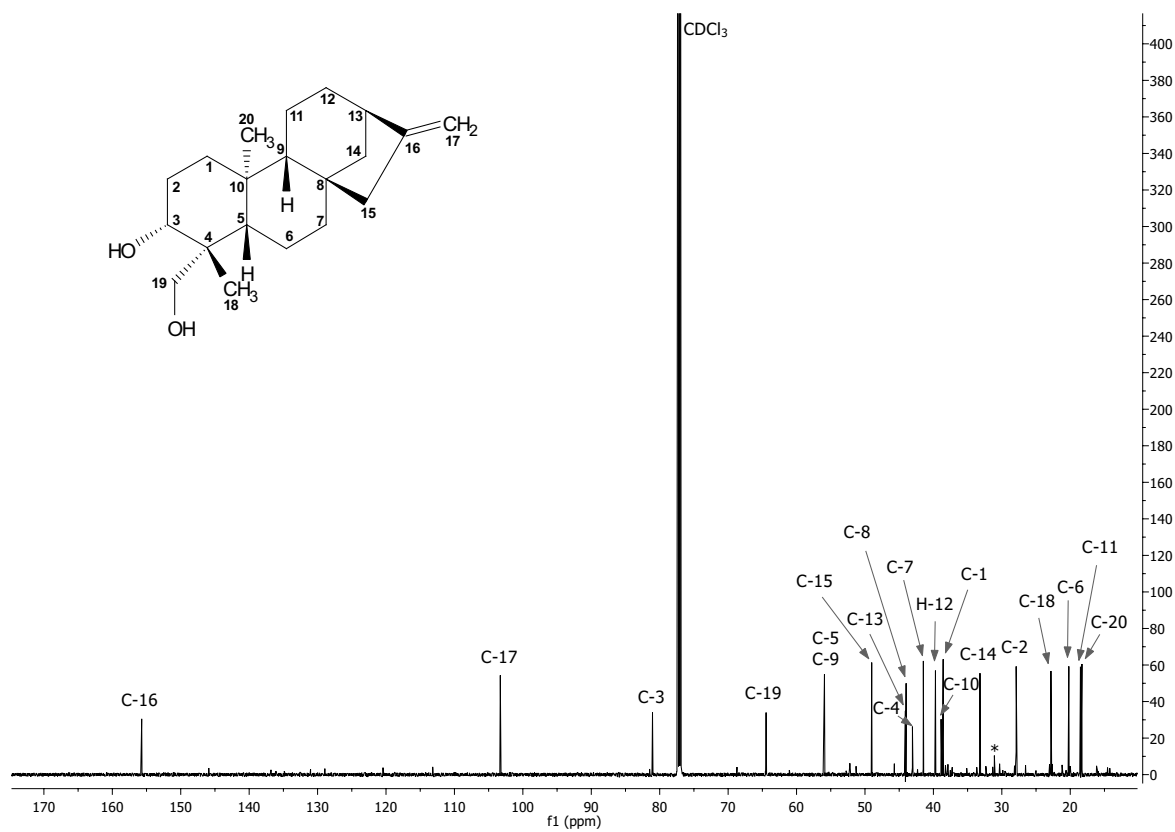

Figure S4.  $^{13}\text{C}$  NMR spectrum of compound 1 ( $\text{CDCl}_3$ , 150 MHz). \*- $\text{CH}_3$  from acetone.

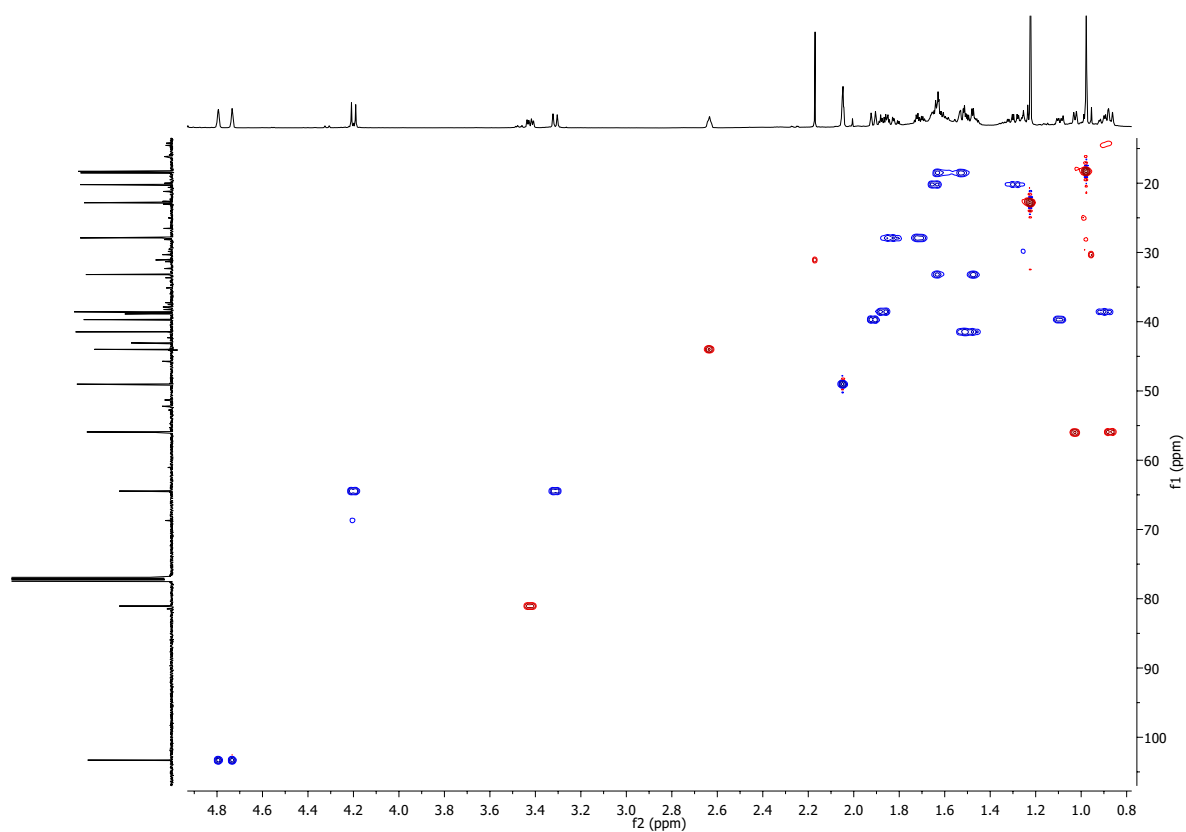

Figure S5.  $^1\text{H}/^{13}\text{C}$ -HSQC spectrum of compound **1** (600/150 MHz,  $\text{CDCl}_3$ ).

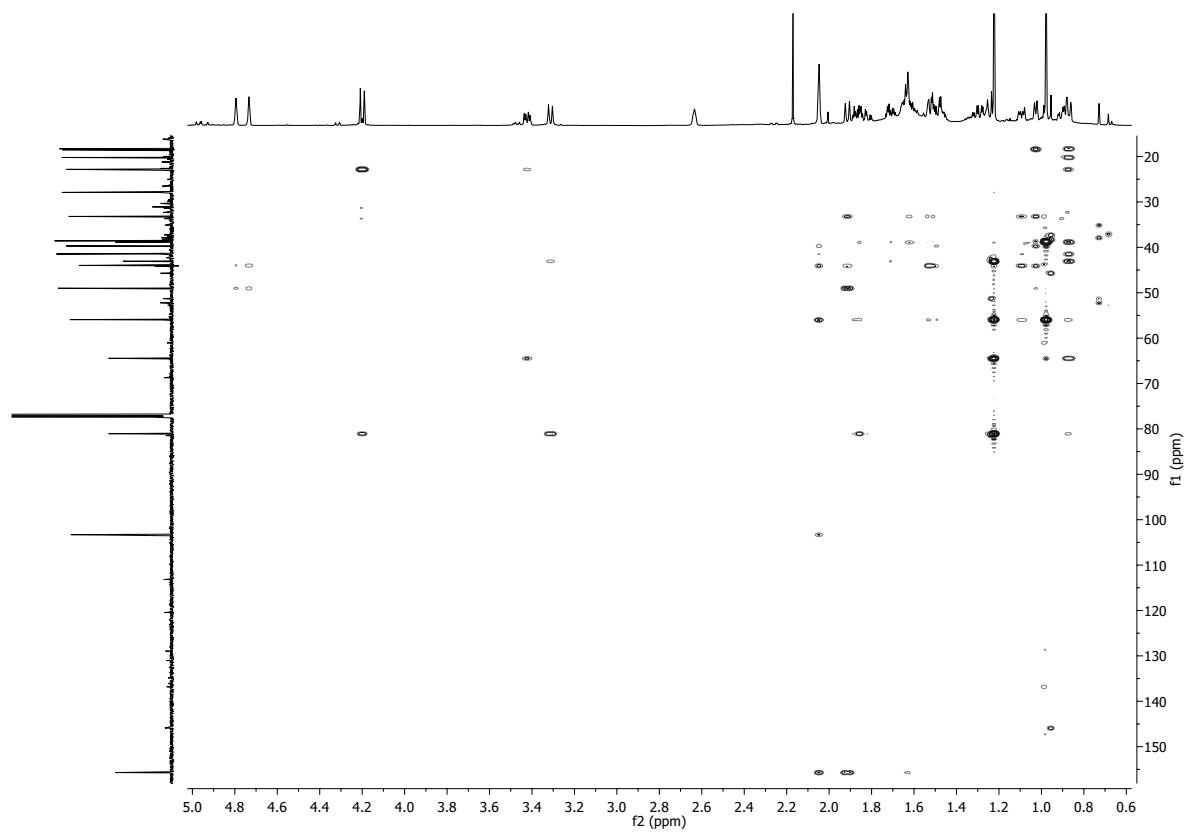

Figure S6.  $^1\text{H}/^{13}\text{C}$ -HMBC spectrum of compound **1** (600/150 MHz,  $\text{CDCl}_3$ ).

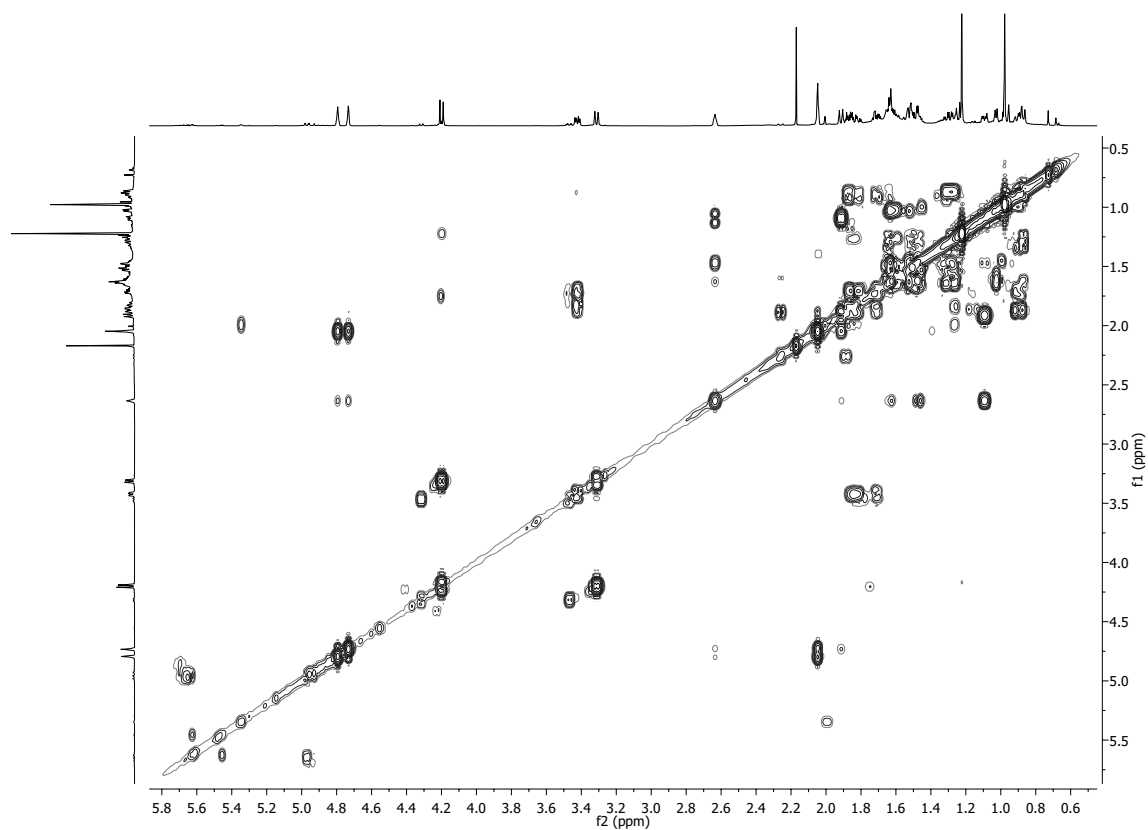

Figure S7.  $^1\text{H}/^1\text{H}$ -COSY spectrum of compound 1 (600 MHz,  $\text{CDCl}_3$ ).

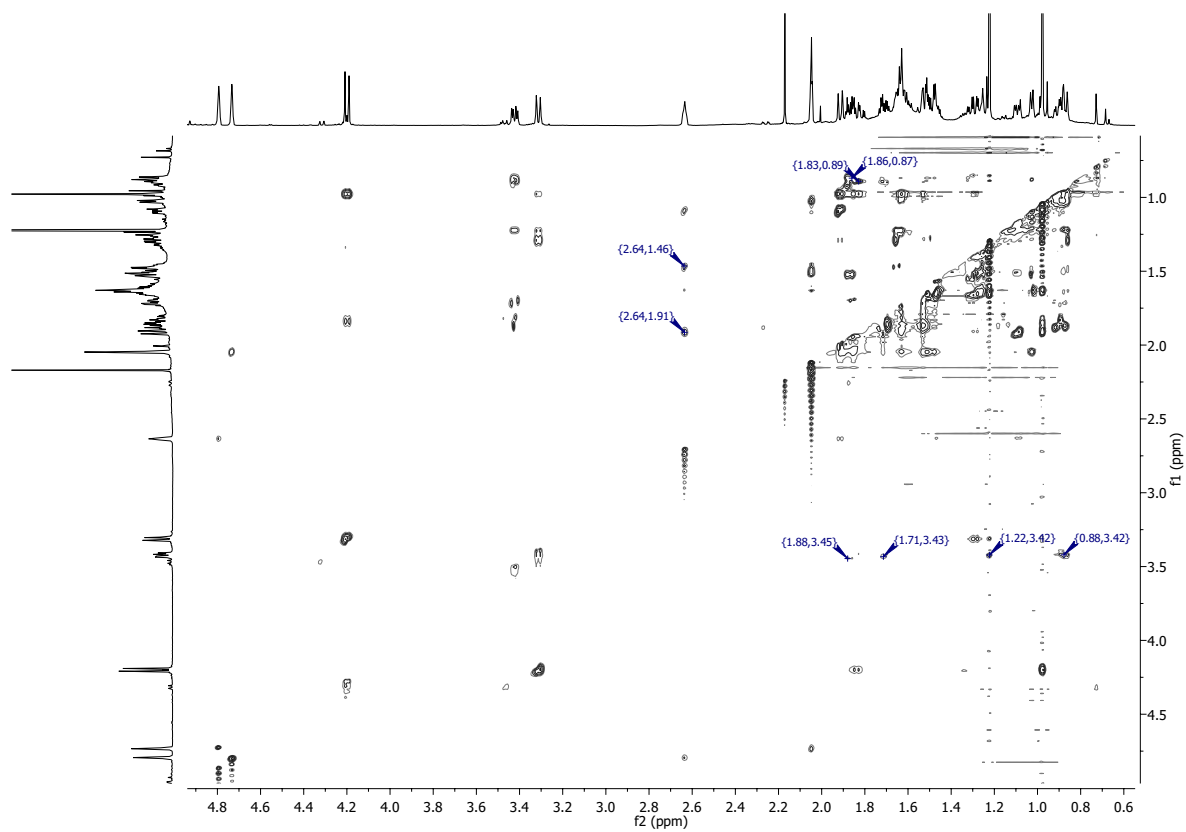

Figure S8.  $^1\text{H}/^1\text{H}$ -NOESY spectrum of compound 1 (600 MHz,  $\text{CDCl}_3$ ).

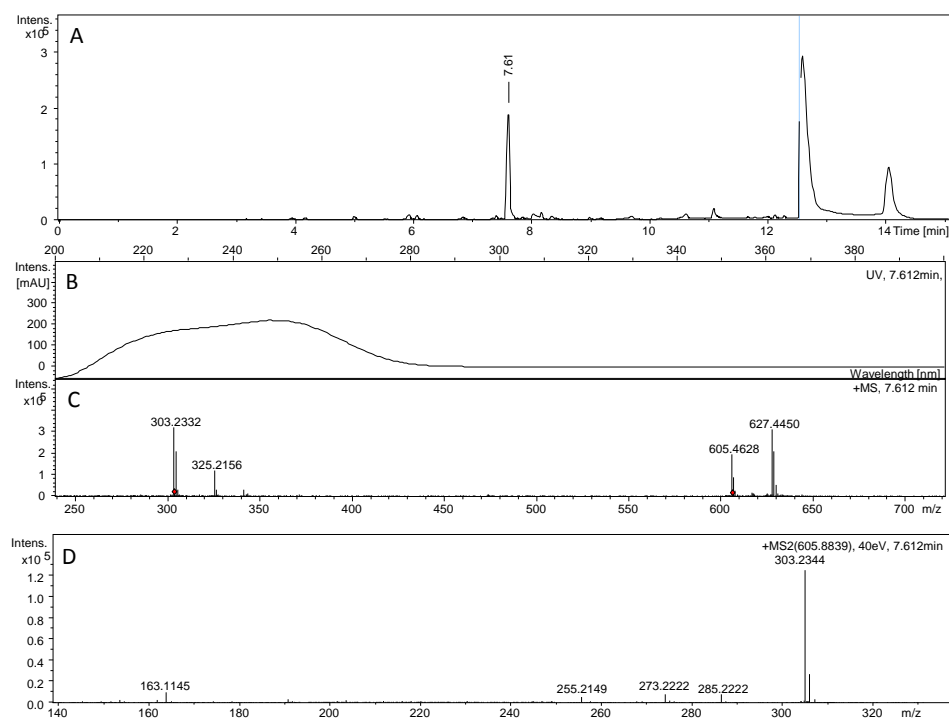

**Figure S9.** +ESI-QqTOF-MS chromatogram (A); UV spectrum (B); +ESI-MS (C) and +ESI-MS2 (D) spectra of compound 2,  $[M + H]^+$ : 303.2346 ( $C_{20}H_{31}O_2$ ). Internal calibrant sodium formate: 12.6 min.

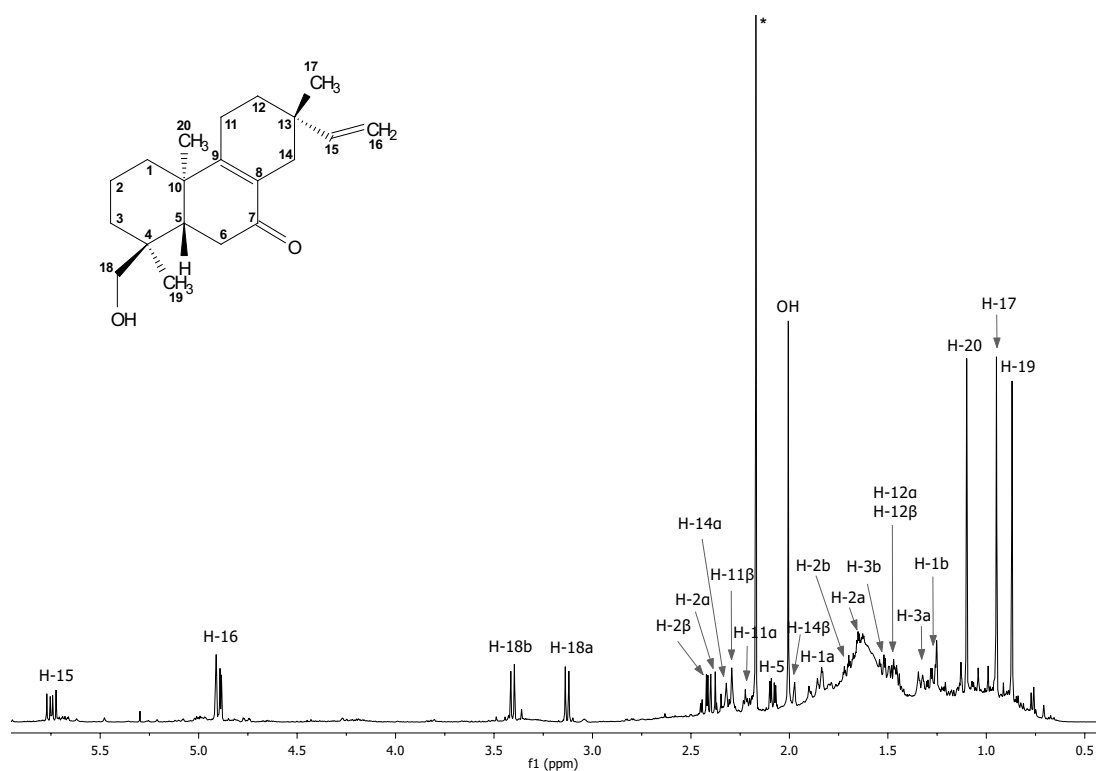

**Figure S10.**  $^1H$  NMR spectrum of compound 2 ( $CDCl_3$ , 600 MHz). \*- $CH_3$  protons from acetone.

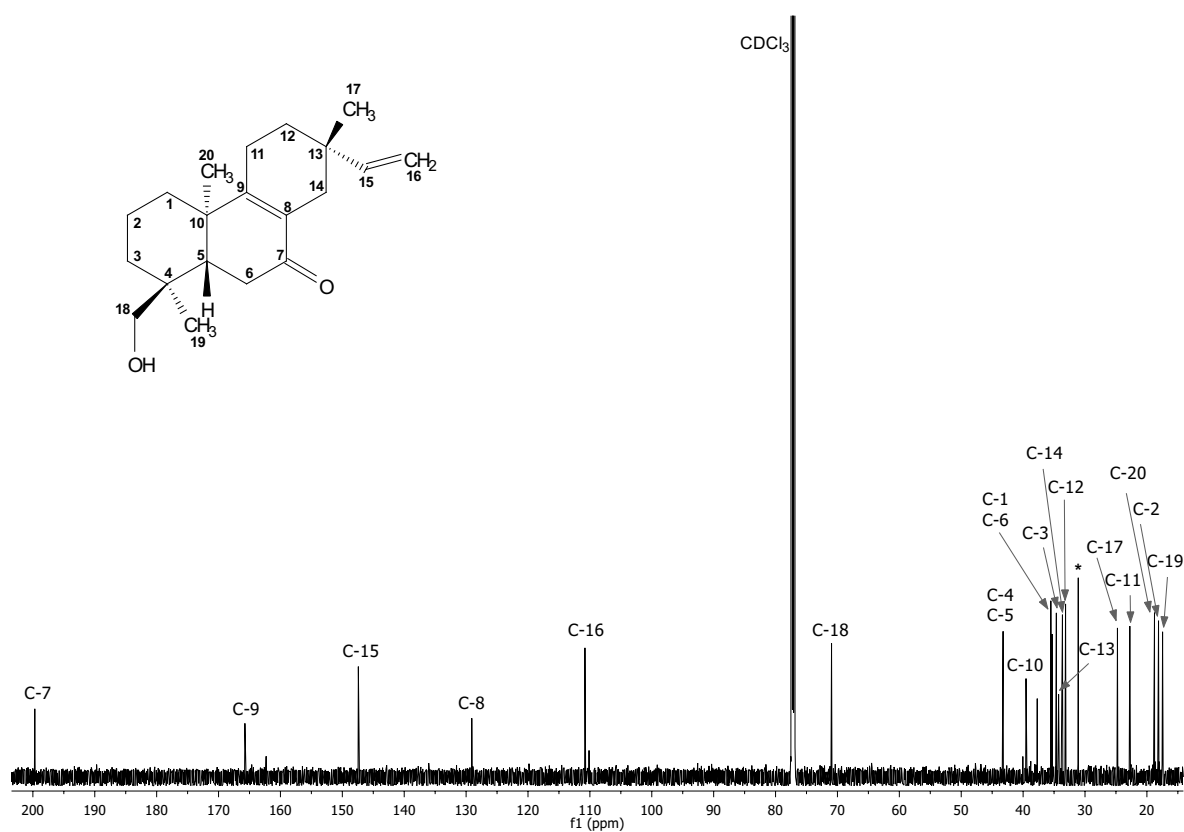

Figure S11.  $^{13}\text{C}$  NMR spectrum of compound 2 (CDCl<sub>3</sub>, 150 MHz). \*-CH<sub>3</sub> from acetone.

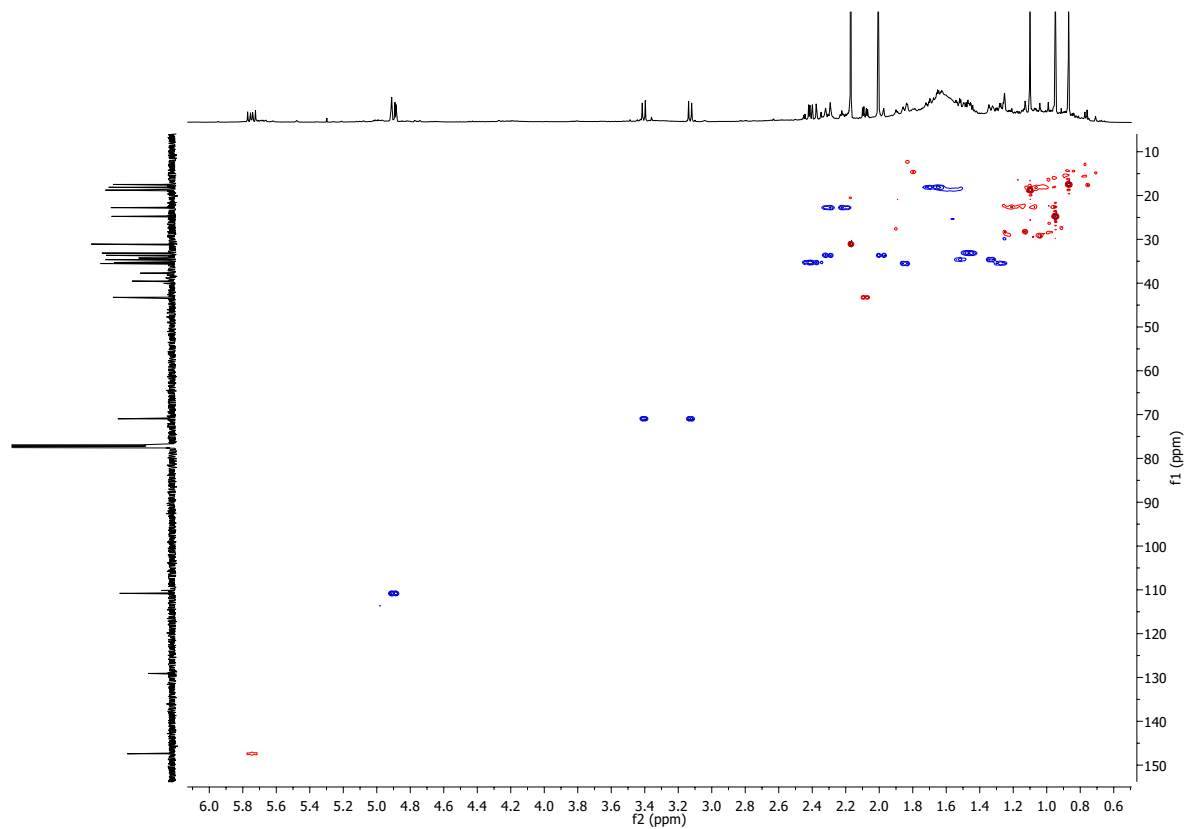

Figure S12.  $^1\text{H}/^{13}\text{C}$ -HSQC spectrum of compound 2 (600/150 MHz, CDCl<sub>3</sub>).

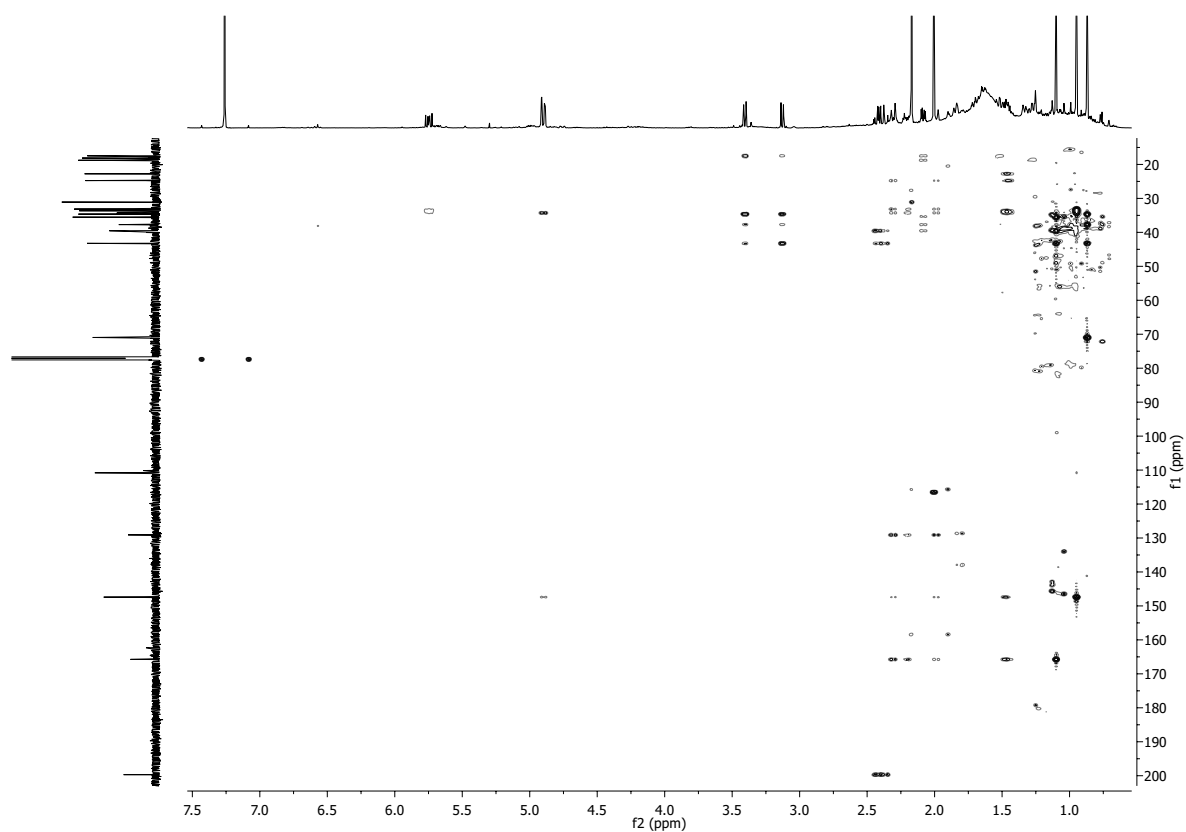

Figure S13.  $^1\text{H}/^{13}\text{C}$ -HMBC spectrum of compound **2** (600/150 MHz,  $\text{CDCl}_3$ ).

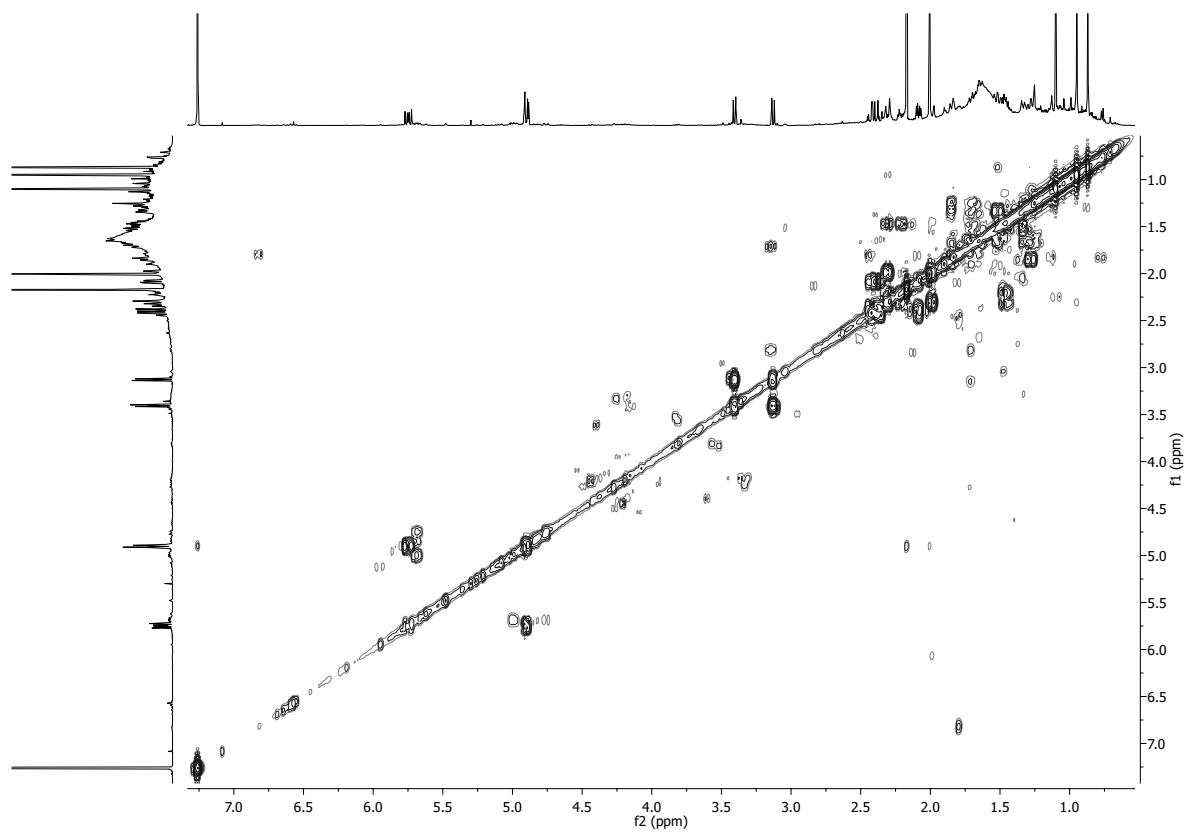

Figure S14.  $^1\text{H}/^1\text{H}$ -COSY spectrum of compound **2** (600 MHz,  $\text{CDCl}_3$ ).

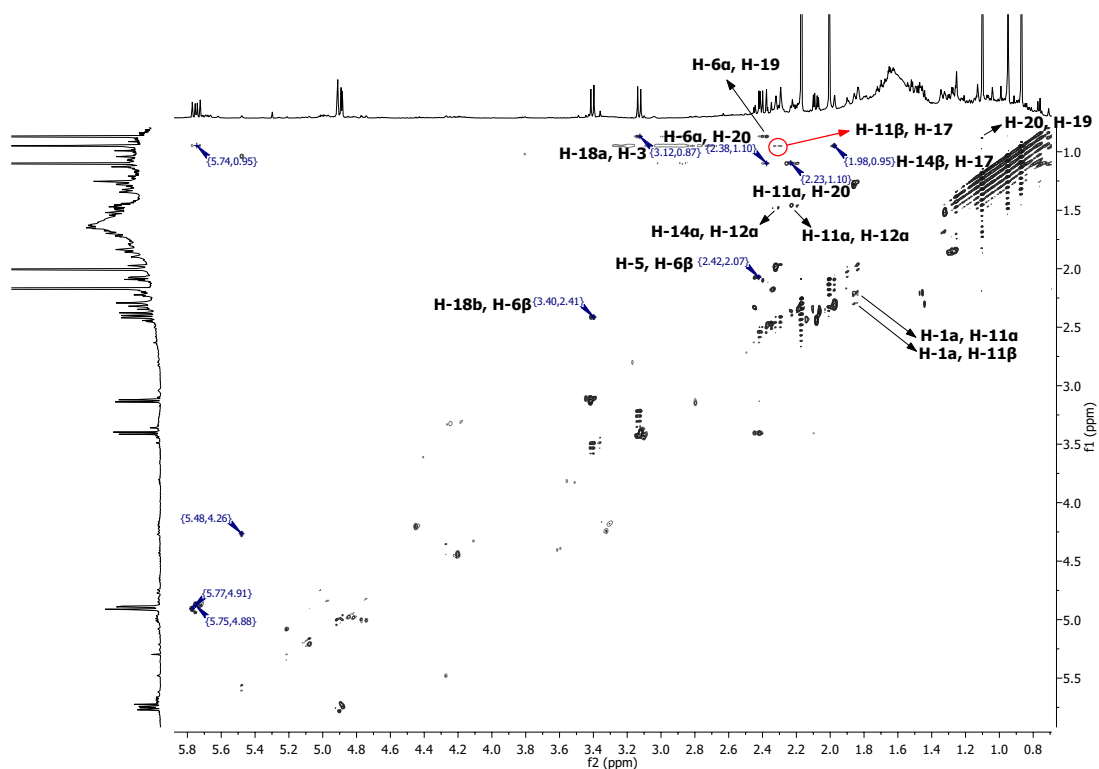

**Figure S15.**  $^1\text{H}/^1\text{H}$ -NOESY spectrum of compound **2** (600 MHz,  $\text{CDCl}_3$ ). Cross-correlated peak (red circle) enabled the determination of the stereochemistry at C-13.

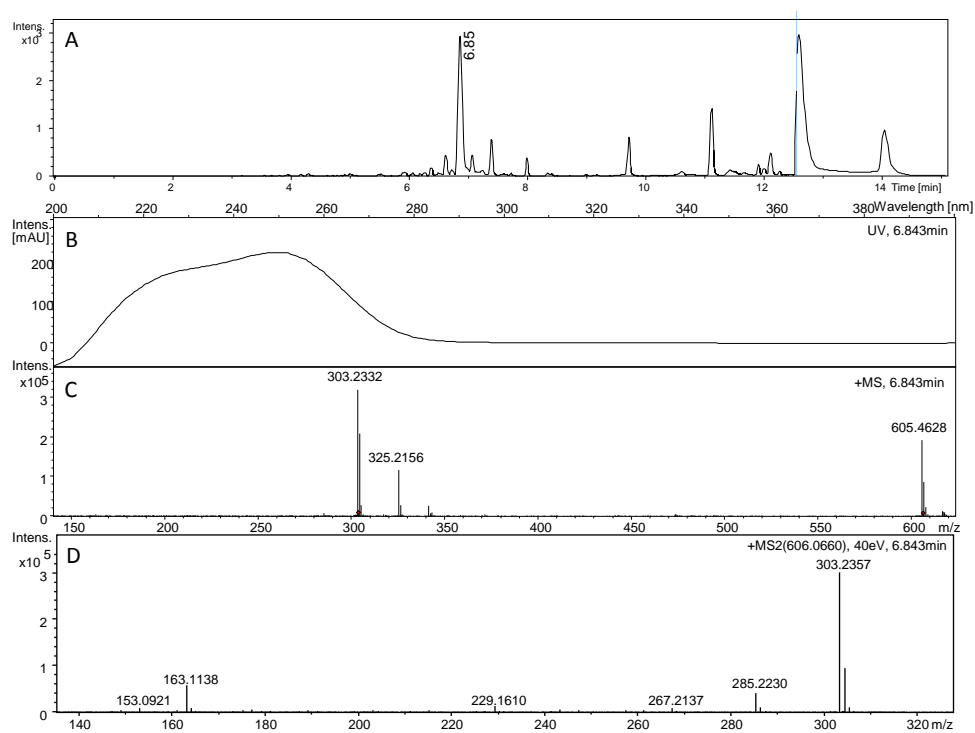

**Figure S16.** +ESI-QqTOF-MS chromatogram (A); UV spectrum (B); +ESI-MS (C) and +ESI-MS2 (D) spectra of compound **3**,  $[\text{M} + \text{H}]^+$ : 303.2332 ( $\text{C}_{20}\text{H}_{31}\text{O}_2$ ). Internal calibrant sodium formate: 12.6 min.



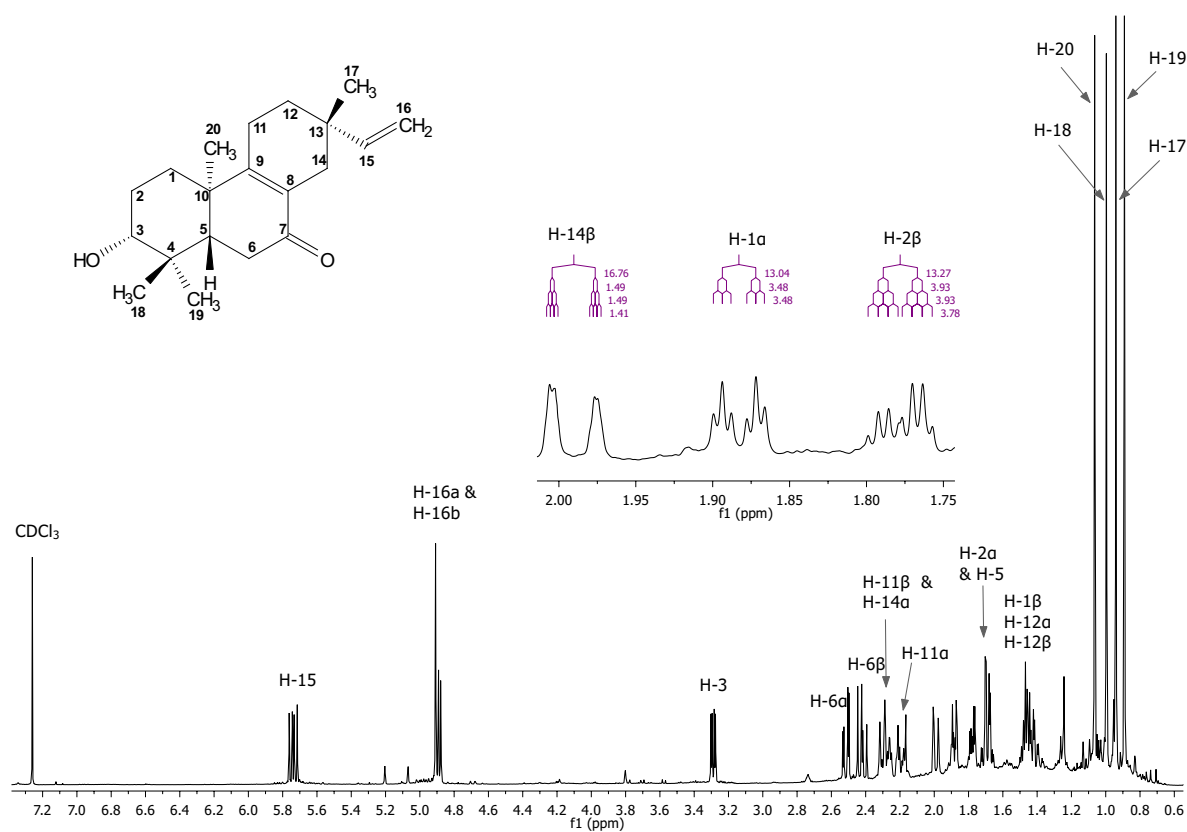Figure S17.  $^1\text{H}$  NMR spectrum of compound 3 (CDCl<sub>3</sub>, 600 MHz).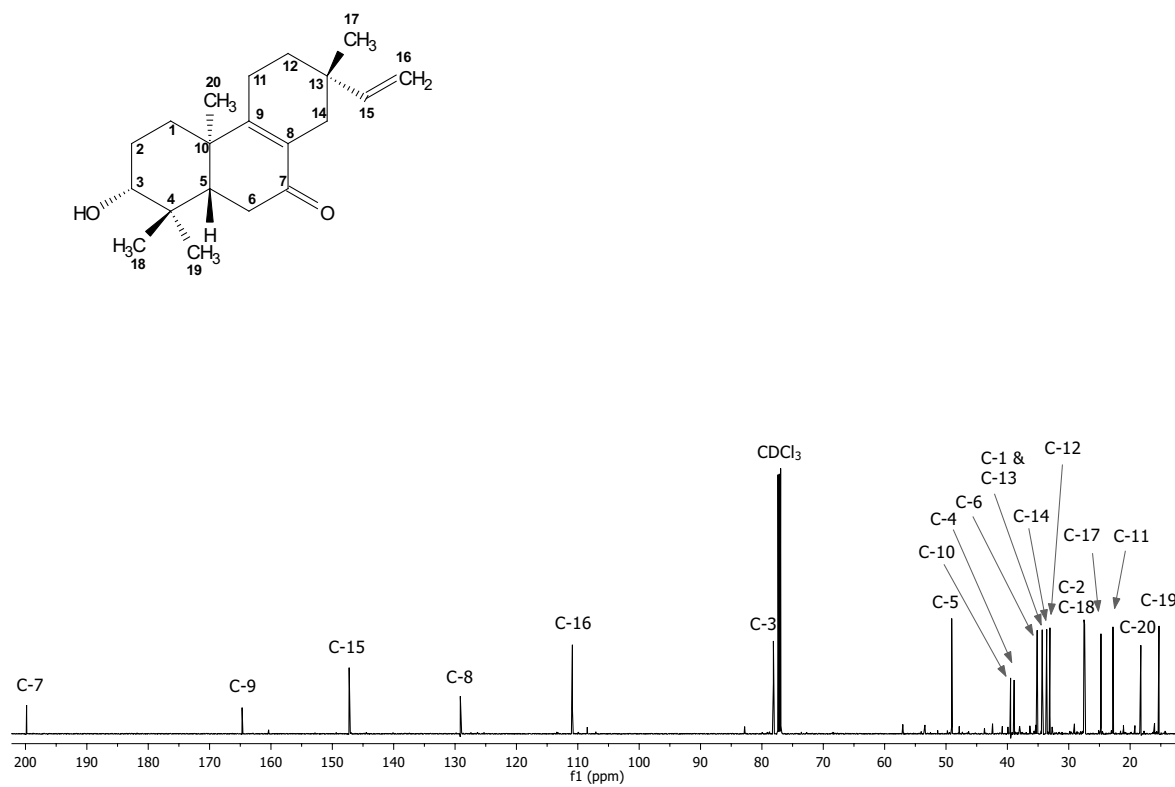Figure S18.  $^{13}\text{C}$  NMR spectrum of compound 3 (CDCl<sub>3</sub>, 150 MHz).

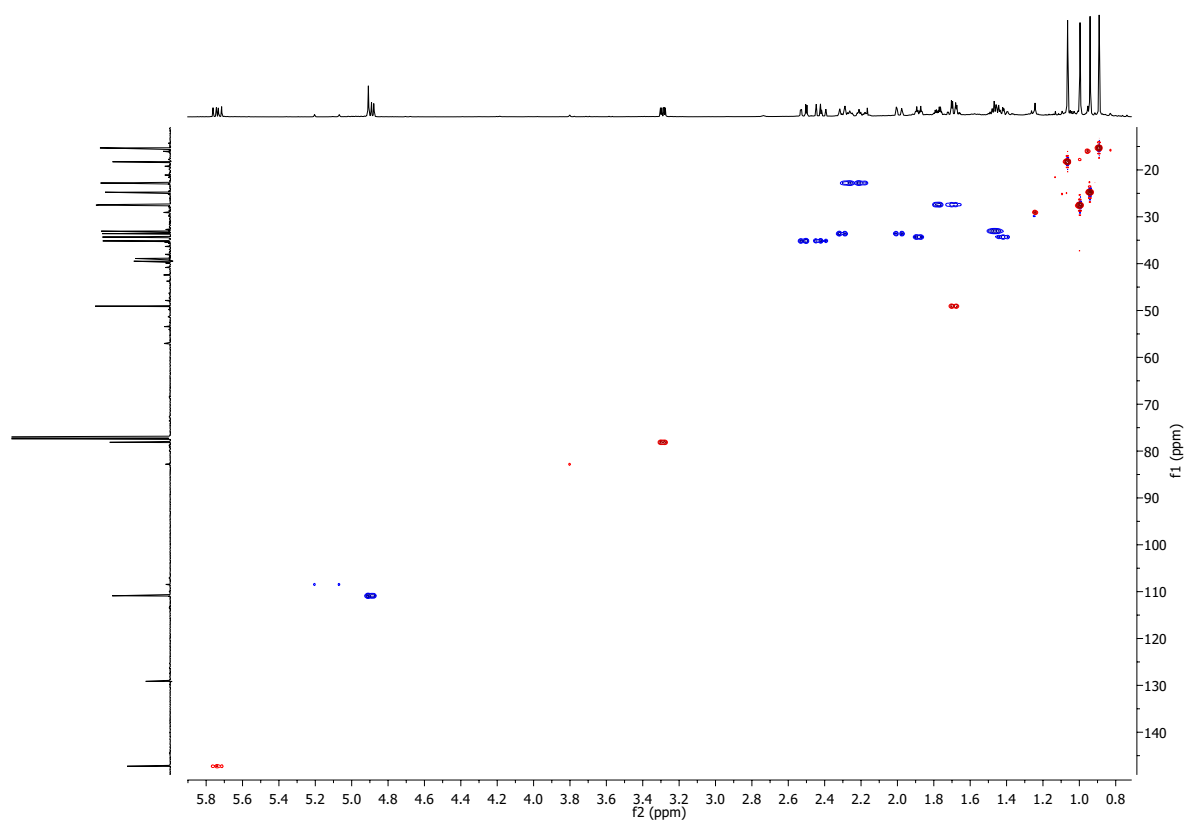

Figure S19.  $^1\text{H}/^{13}\text{C}$ -HSQC spectrum of compound 3 (600/150 MHz,  $\text{CDCl}_3$ ).

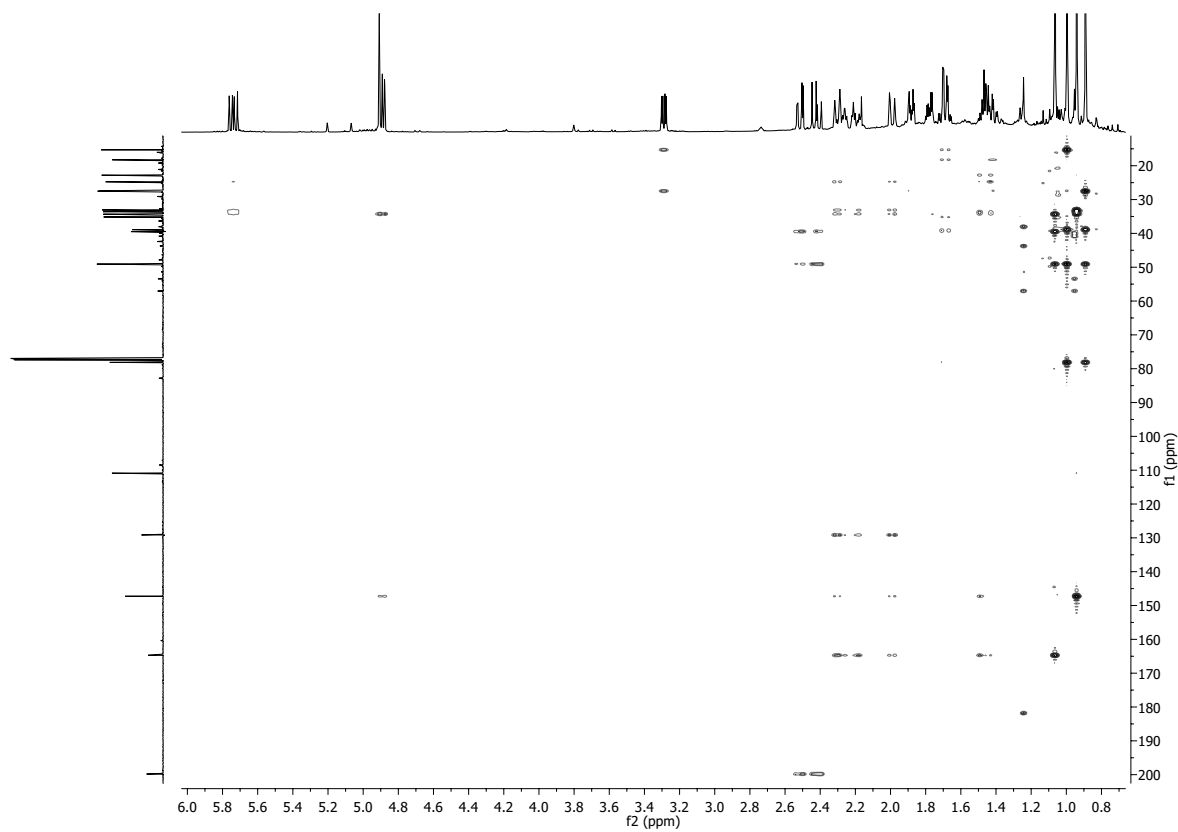

Figure S20.  $^1\text{H}/^{13}\text{C}$ -HMBC spectrum of compound 3 (600/150 MHz,  $\text{CDCl}_3$ ).

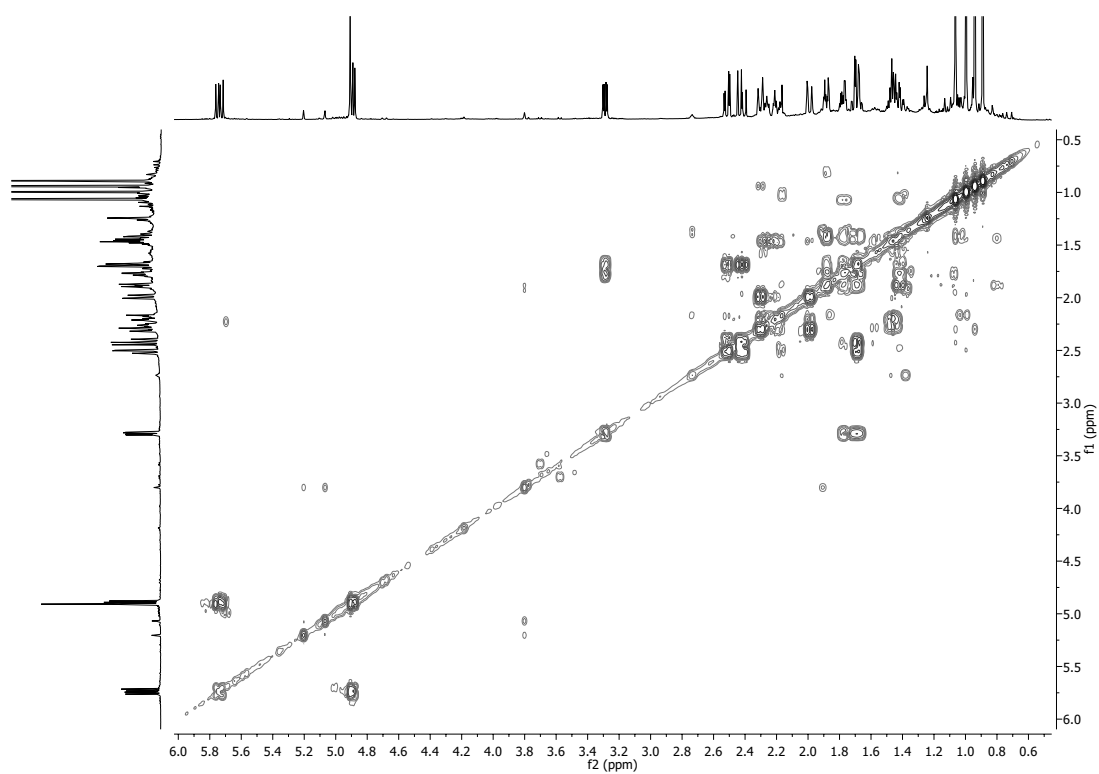

Figure S21.  $^1\text{H}/^1\text{H}$ -COSY spectrum of compound **3** (600 MHz,  $\text{CDCl}_3$ ).

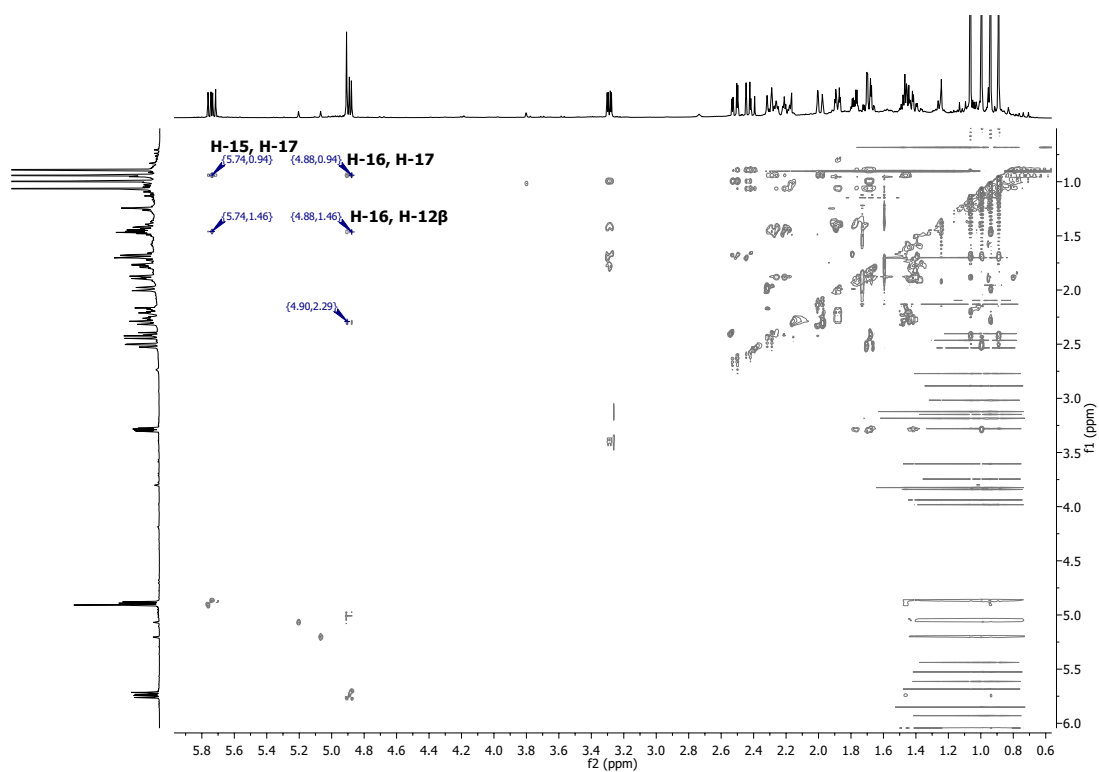

Figure S22. Partial  $^1\text{H}/^1\text{H}$ -NOESY spectrum of compound **3** (600 MHz,  $\text{CDCl}_3$ ) highlighting correlations in the downfield region.

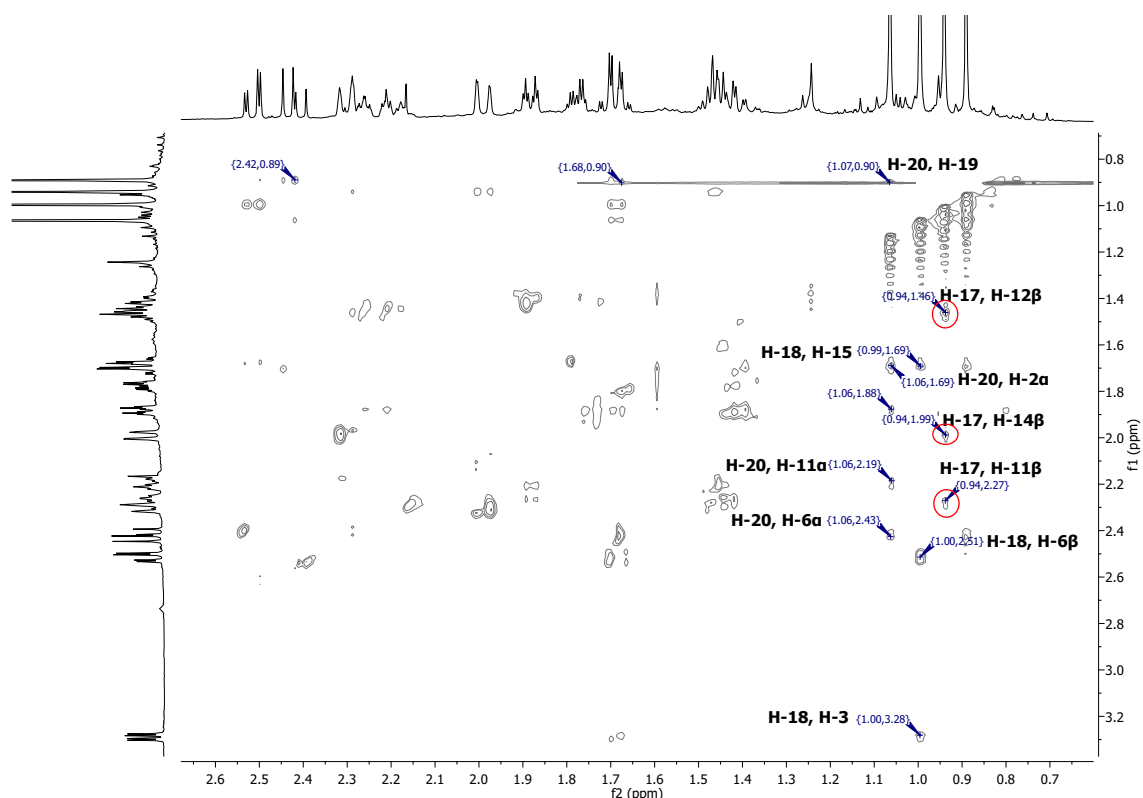

**Figure S23.** Partial  $^1\text{H}/^1\text{H}$ -NOESY spectrum of compound **3** (600 MHz,  $\text{CDCl}_3$ ) showing correlations in the upfield region. Stereochemistry at C-13 in compound **4** is justified by the NOE effects circled in red.

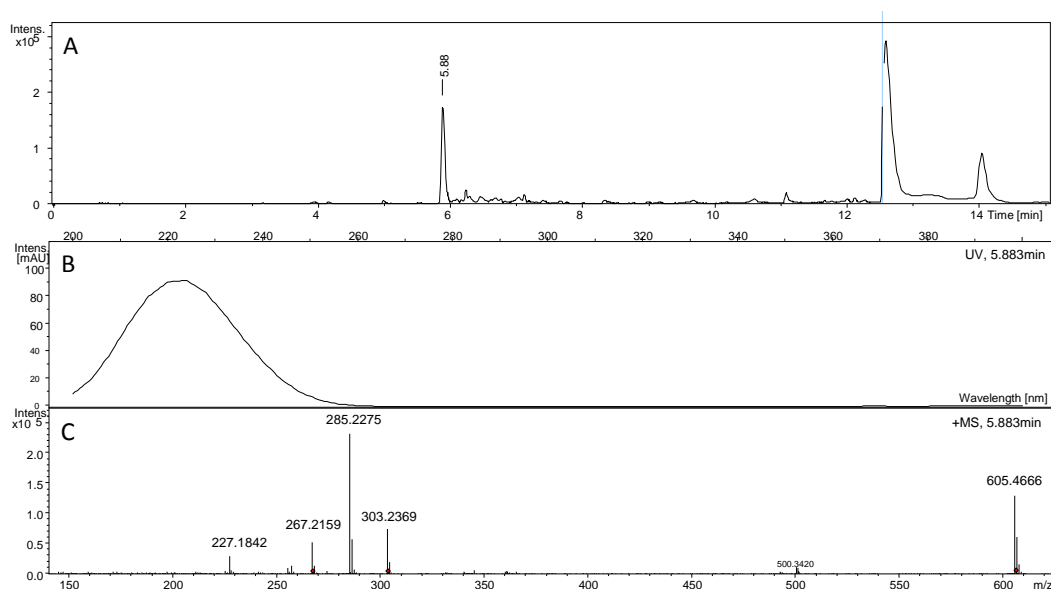

**Figure S24.** +ESI-QqTOF-MS chromatogram (A); UV spectrum (B); +ESI-MS (C) and +ESI-MS2 (D) spectra of compound **4**,  $[\text{M} + \text{H}]^+$ : 303.2369 ( $\text{C}_{20}\text{H}_{31}\text{O}_2$ ). Internal calibrant sodium formate: 12.6 min.

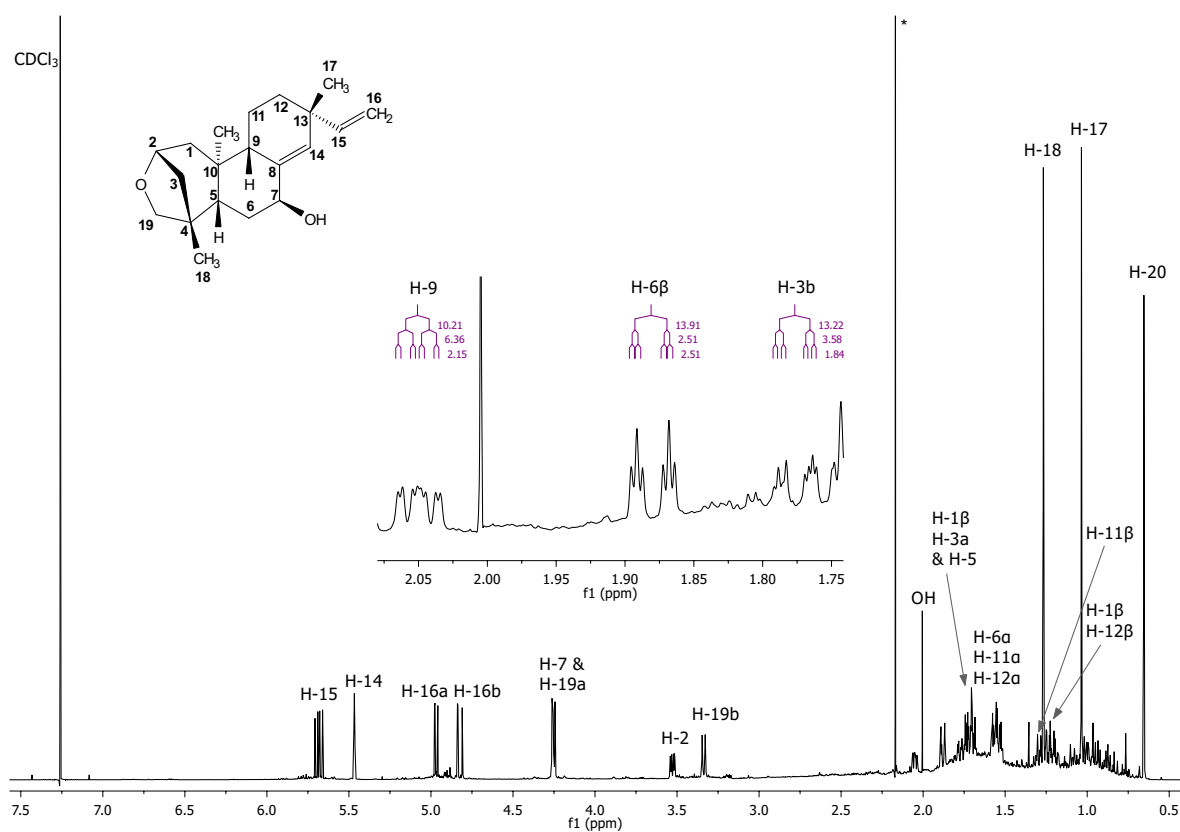

**Figure S25.**  $^1\text{H}$  NMR spectrum of compound **4** ( $\text{CDCl}_3$ , 600 MHz). \*- $\text{CH}_3$  protons from acetone.

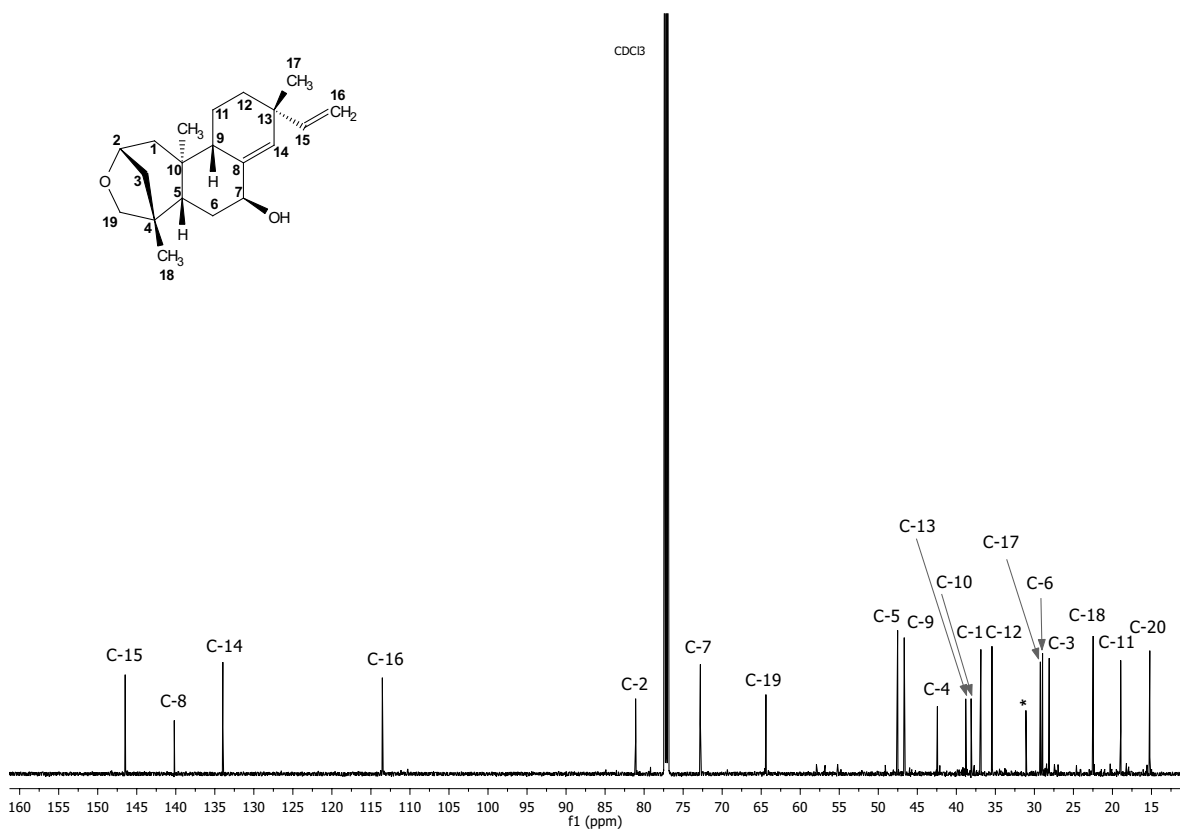

**Figure S26.**  $^{13}\text{C}$  NMR spectrum of compound **4** ( $\text{CDCl}_3$ , 150 MHz). \*- $\text{CH}_3$  from acetone.

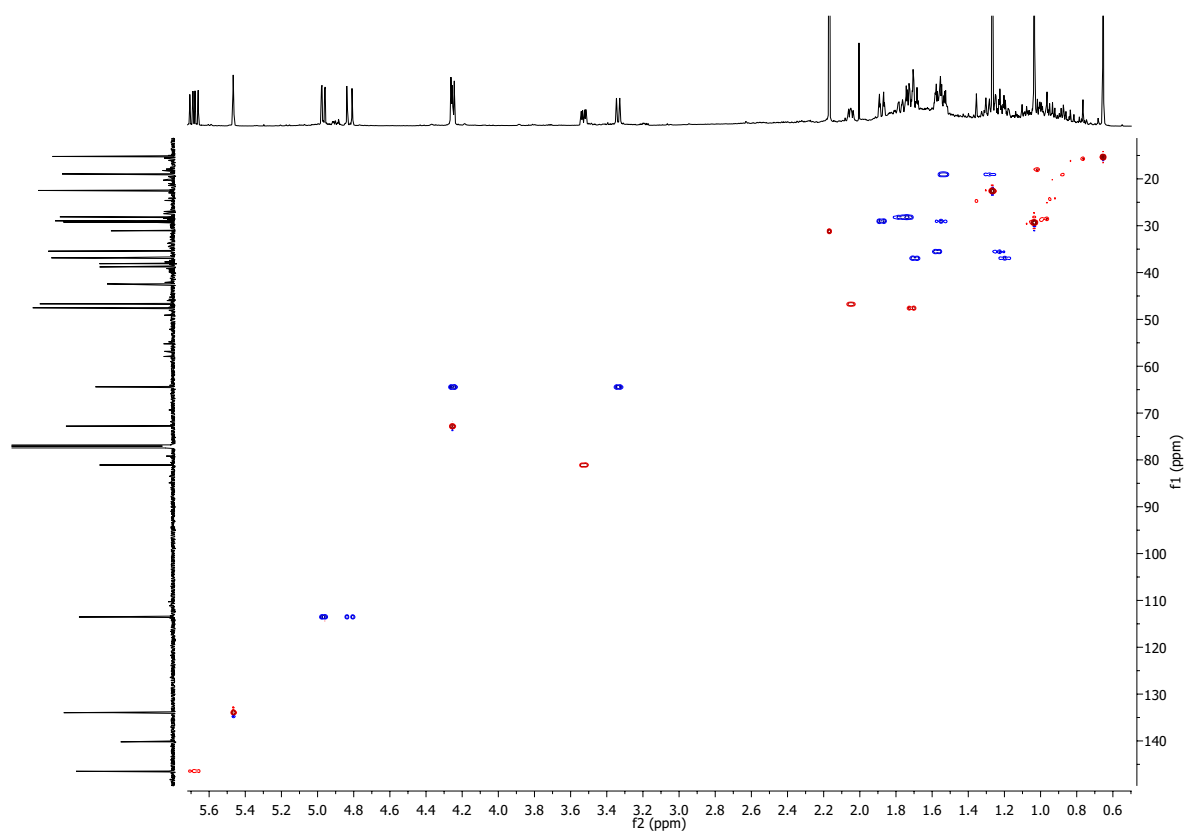

Figure S27.  $^1\text{H}/^{13}\text{C}$ -HSQC spectrum of compound 4 (600/150 MHz,  $\text{CDCl}_3$ ).

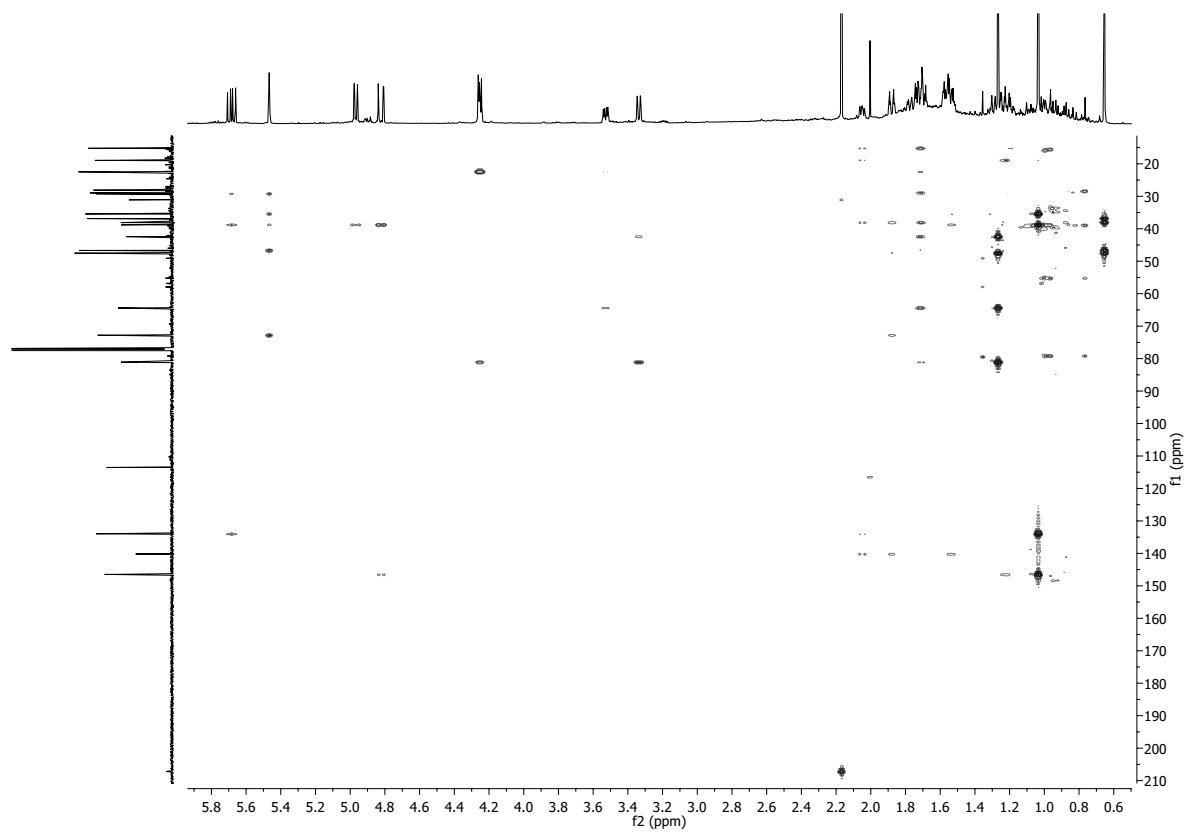

Figure S28.  $^1\text{H}/^{13}\text{C}$ -HMBC spectrum of compound 4 (600/150 MHz,  $\text{CDCl}_3$ ).

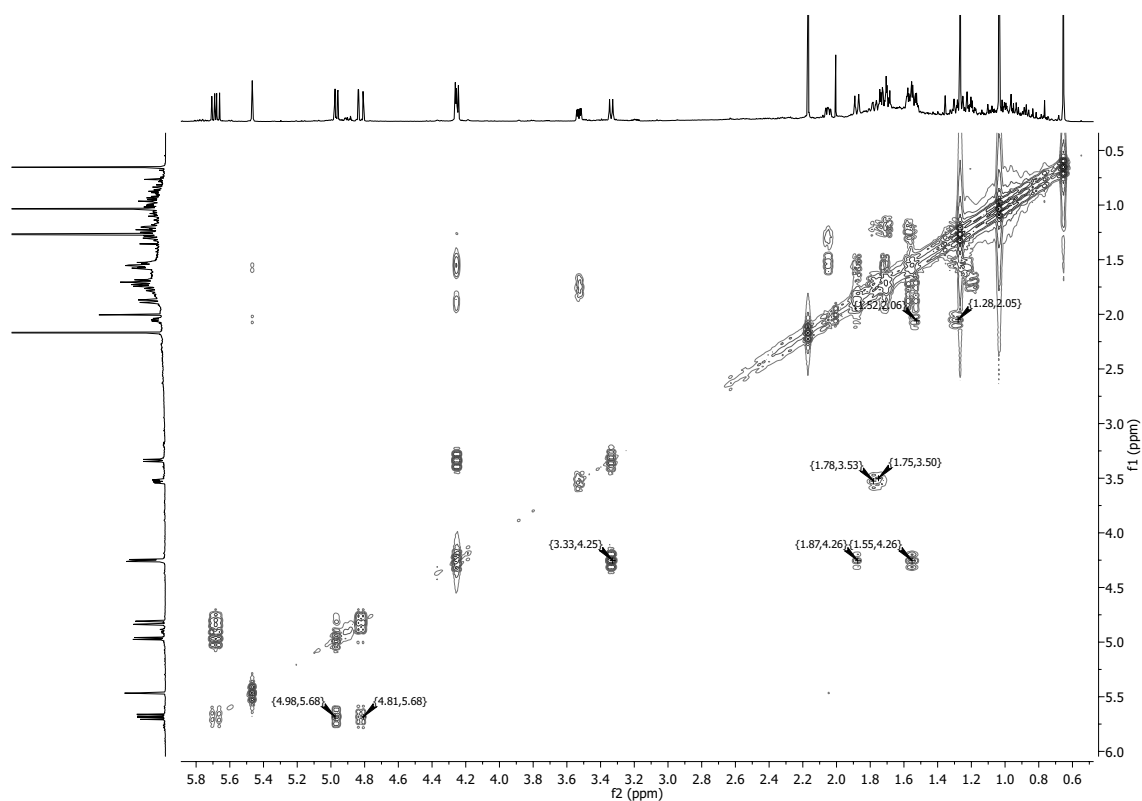Figure S29.  $^1\text{H}/^1\text{H}$ -COSY spectrum of compound **4** (600 MHz,  $\text{CDCl}_3$ ).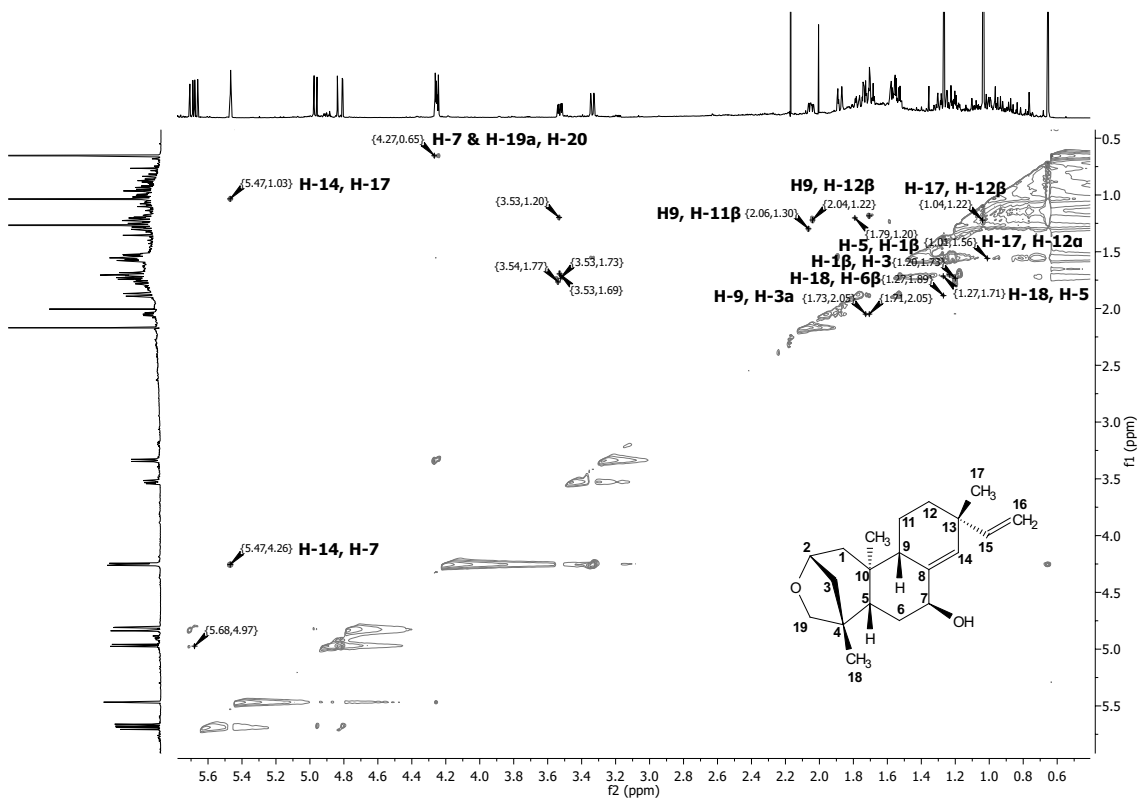Figure S30.  $^1\text{H}/^1\text{H}$ -NOESY spectrum of compound **4** (600 MHz,  $\text{CDCl}_3$ ).
