# Supplementary material for: ent-Pimarane and ent-Kaurane Diterpenes from Aldama discolor (Asteraceae) and Their Antiprotozoal Activity
Source: MDPI journal article supplement (doi:10.3390/molecules21091237), 2016-09-15
Supplement: s2 [file s2]

## Article

# *ent*-Pimarane and *ent*-Kaurane Diterpenes from *Aldama discolor* (Asteraceae) and their Antiprotozoal Activity

Mauro S. Nogueira<sup>1</sup>, Fernando B. Da Costa<sup>2</sup>, Reto Brun<sup>3,4</sup>, Marcel Kaiser<sup>3,4</sup> and Thomas J. Schmidt<sup>1,\*</sup>

<sup>1</sup> Institute of Pharmaceutical Biology and Phytochemistry (IPBP), University of Münster, PharmaCampus Corrensstraße 48, Münster D-48149, Münster, Germany; nogueira@uni-muenster.de (M.N.); thomschm@uni-muenster.de (T.J.S.)

<sup>2</sup> AsterBioChem Research Team, Laboratory of Pharmacognosy, School of Pharmaceutical Sciences of Ribeirão Preto, USP, Av. do Café s/n, 14040-903, Ribeirão Preto-SP, Brazil; febcosta@fcrp.usp.br

<sup>3</sup> Swiss Tropical and Public Health Institute (Swiss TPH), Socinstr. 57, Basel CH-4051, Switzerland; marcel.kaiser@unibas.ch

<sup>4</sup> University of Basel, Petersplatz 1, Basel CH-4003, Switzerland

\* Correspondence: thomschm@uni-muenster.de; Tel.: +49-251-83-33378

Academic Editor: Dereck J. McPhee

Version August 31, 2016 submitted to *Molecules*; Typeset by L<sup>A</sup>T<sub>E</sub>X using class file mdpi.cls

## 1. Supporting Information

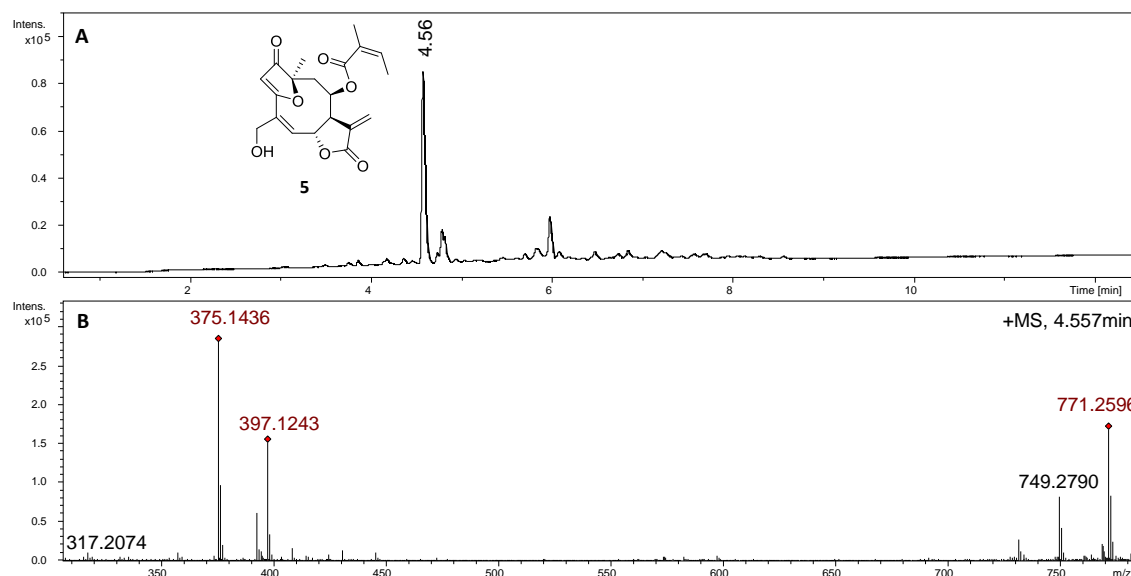

**Figure S1.** A: LC-MS-chromatogram of the last fraction (elution with EtOAc) of the CC on silica gel of the dichloromethane extract of *A. discolor* leaves. B: +ESI-MS of its major compound, budlein A.  $[M+H]^+$ : 375.1436 ( $C_{20}H_{23}O_7$ ).

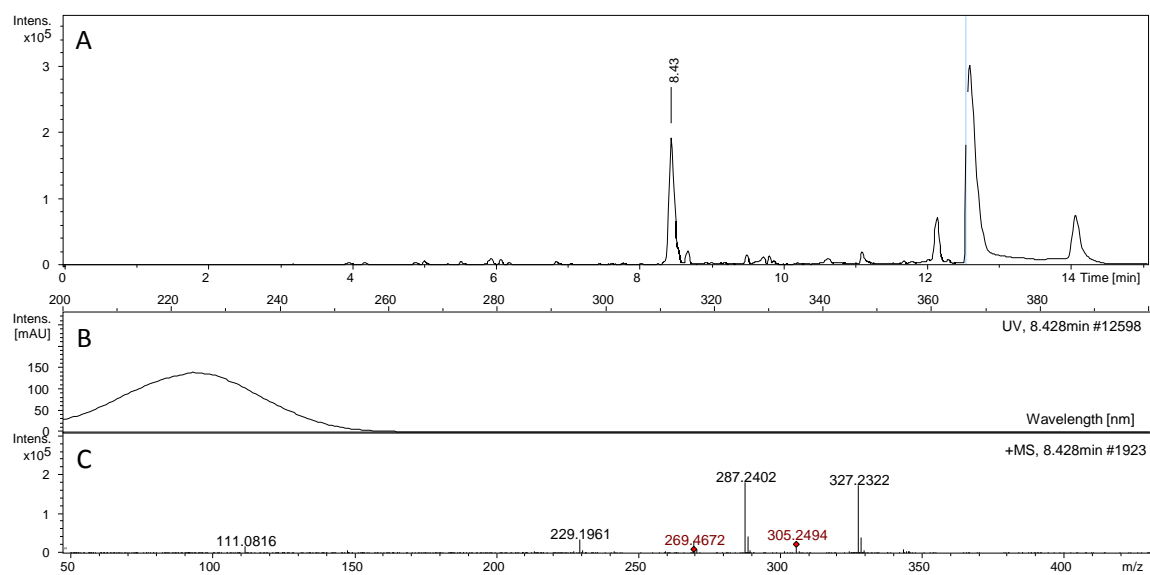

**Figure S2.** +ESI-QqTOF-MS chromatogram (A), UV spectrum (B), +ESI-MS (C) of compound 1, [M+H]<sup>+</sup>: 305.2494 (C<sub>20</sub>H<sub>33</sub>O<sub>2</sub>) and [M+Na]<sup>+</sup>: 327.2322 (C<sub>20</sub>H<sub>32</sub>O<sub>2</sub>Na). Internal calibrant sodium formate: 12.6 min.

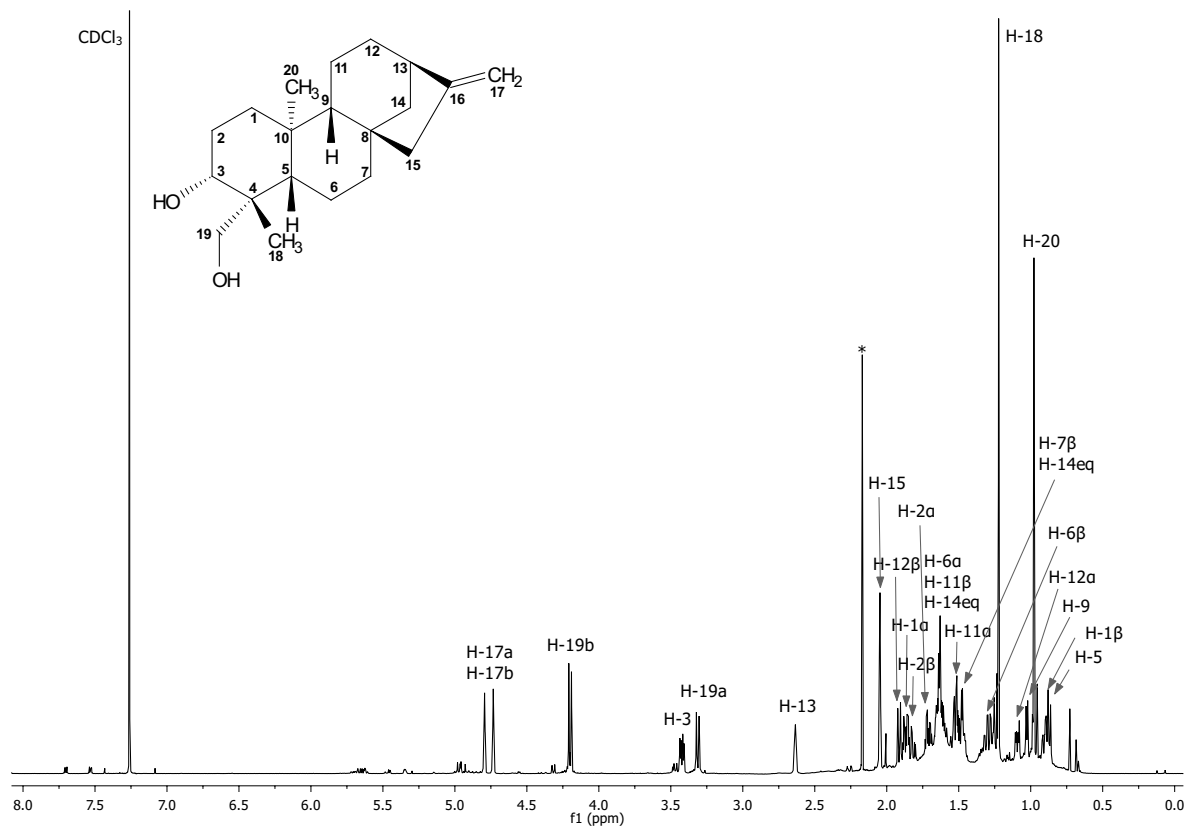

**Figure S3.** <sup>1</sup>H NMR spectrum of compound 1 (CDCl<sub>3</sub>, 600 MHz). \*-CH<sub>3</sub> protons from acetone.

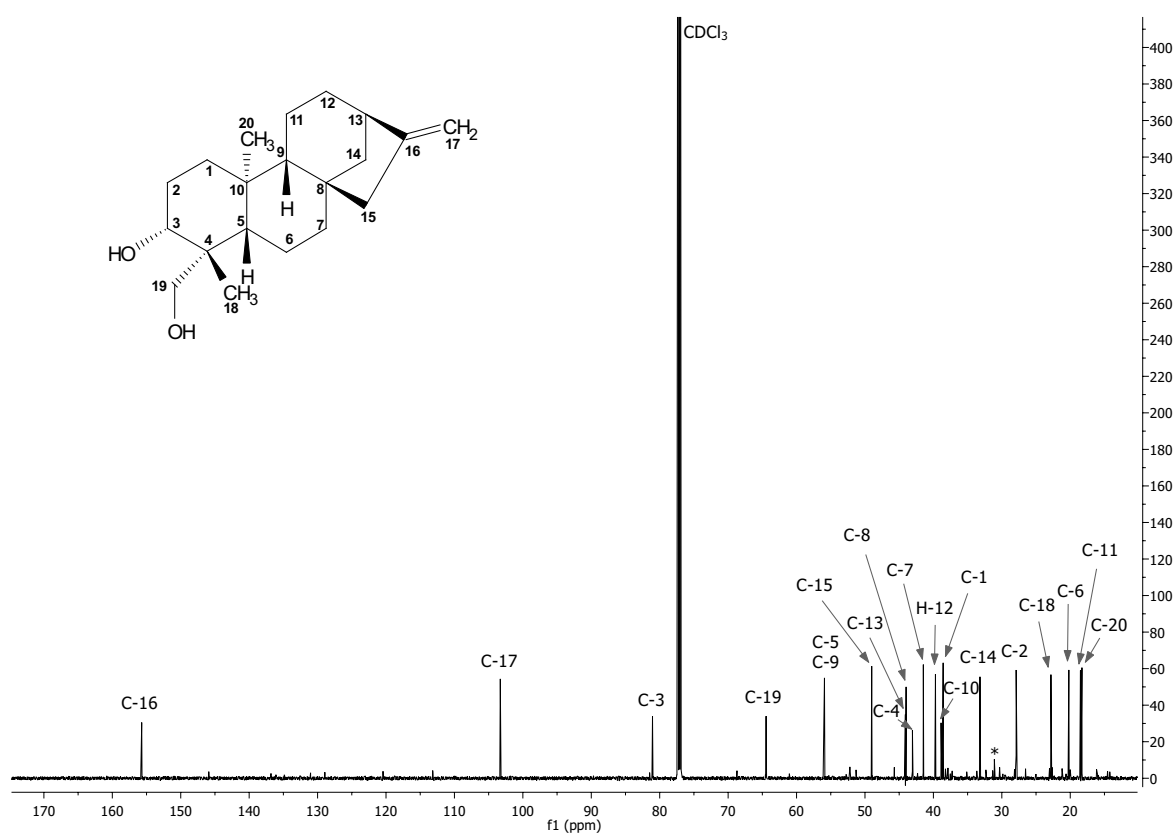

**Figure S4.**  $^{13}\text{C}$  NMR spectrum of compound **1** ( $\text{CDCl}_3$ , 150 MHz). \*- $\text{CH}_3$  from acetone.

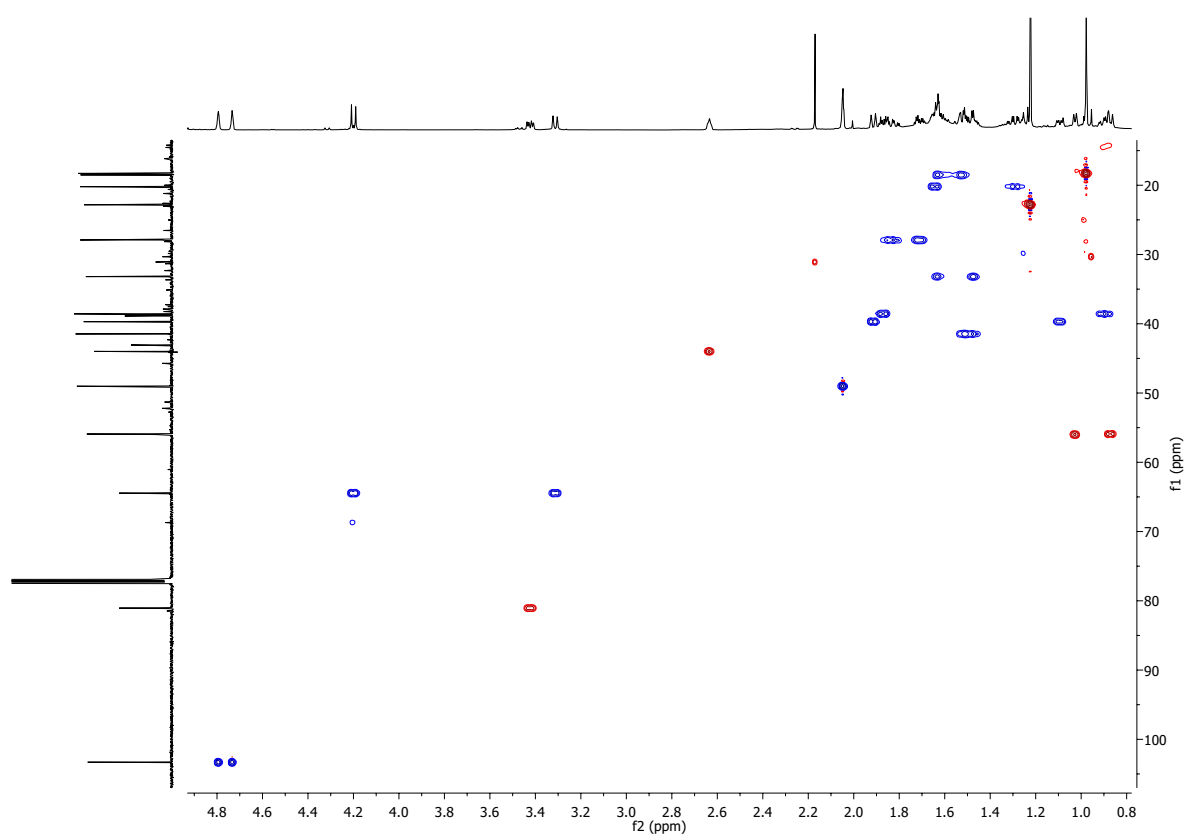

**Figure S5.**  $^1\text{H}/^{13}\text{C}$ -HSQC spectrum of compound **1** (600/150 MHz,  $\text{CDCl}_3$ ).

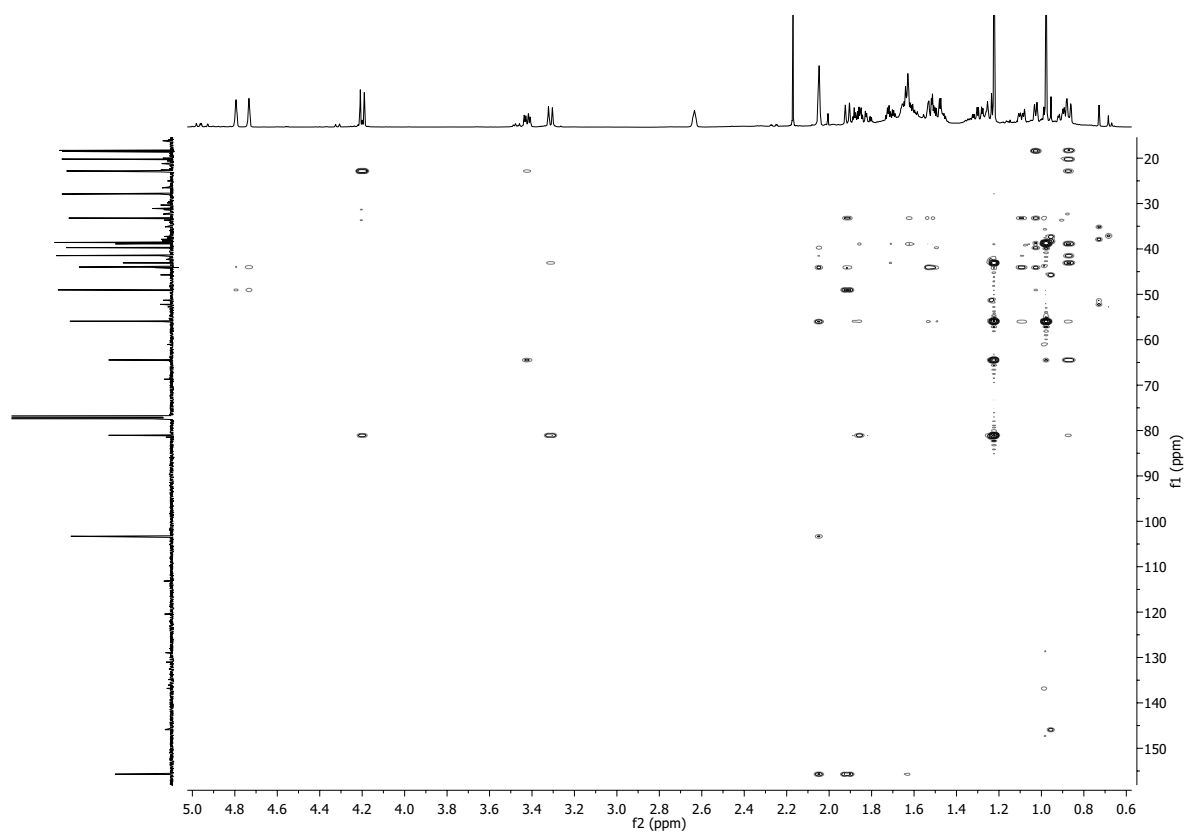

**Figure S6.**  $^1\text{H}/^{13}\text{C}$ -HMBC spectrum of compound **1** (600/150 MHz,  $\text{CDCl}_3$ ).

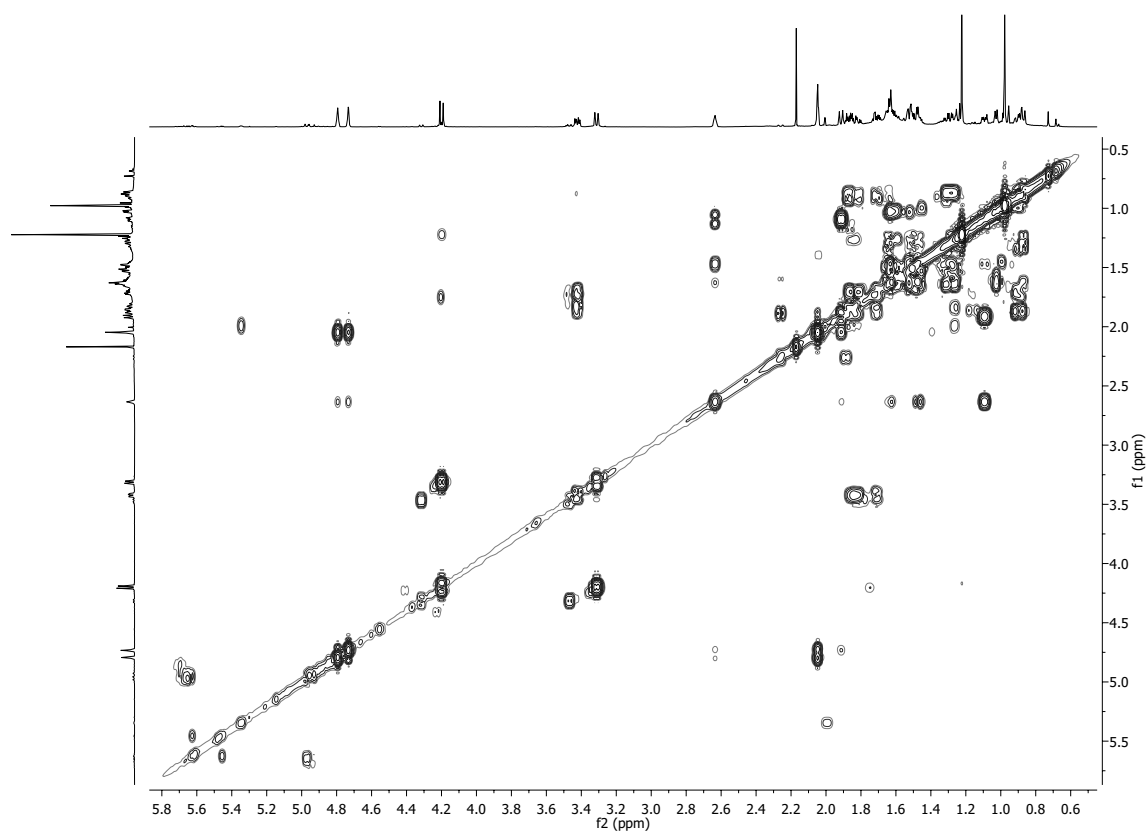

**Figure S7.**  $^1\text{H}/^1\text{H}$ -COSY spectrum of compound **1** (600 MHz,  $\text{CDCl}_3$ ).

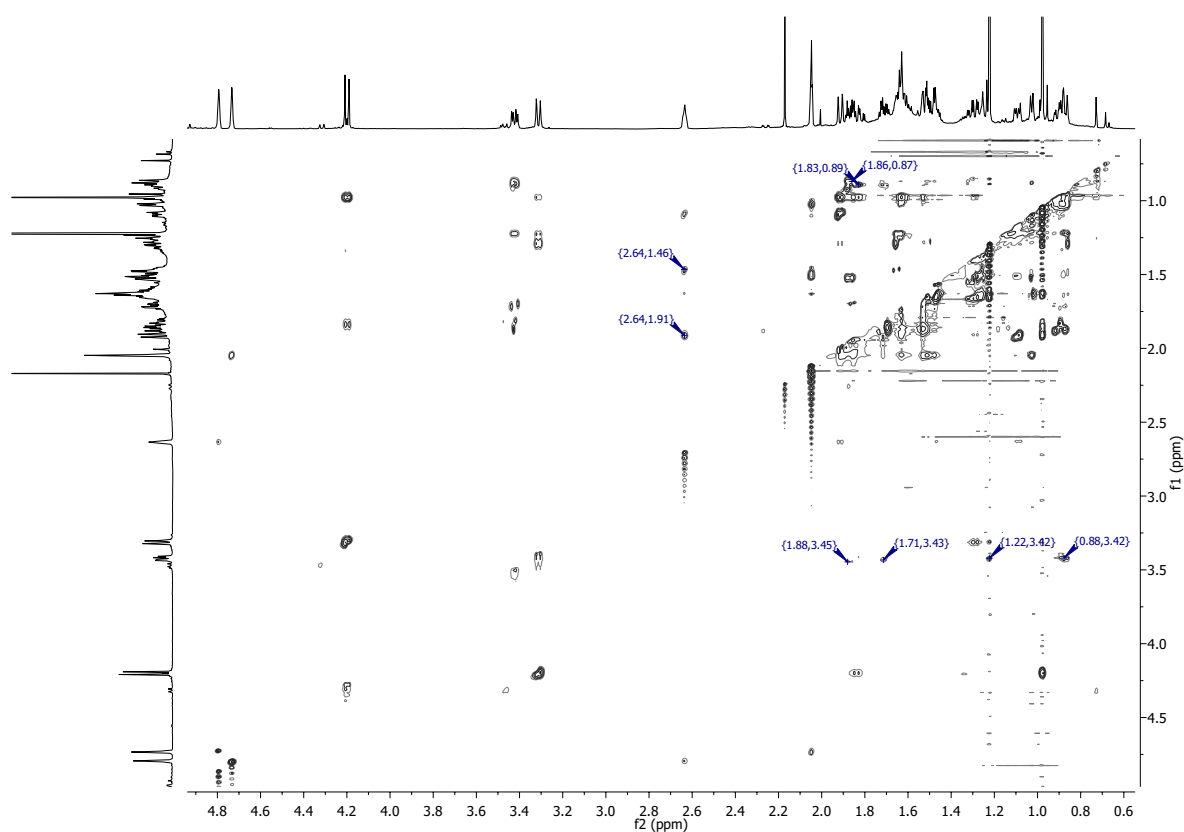

**Figure S8.**  $^1\text{H}/^1\text{H}$ -NOESY spectrum of compound **1** (600 MHz,  $\text{CDCl}_3$ ).

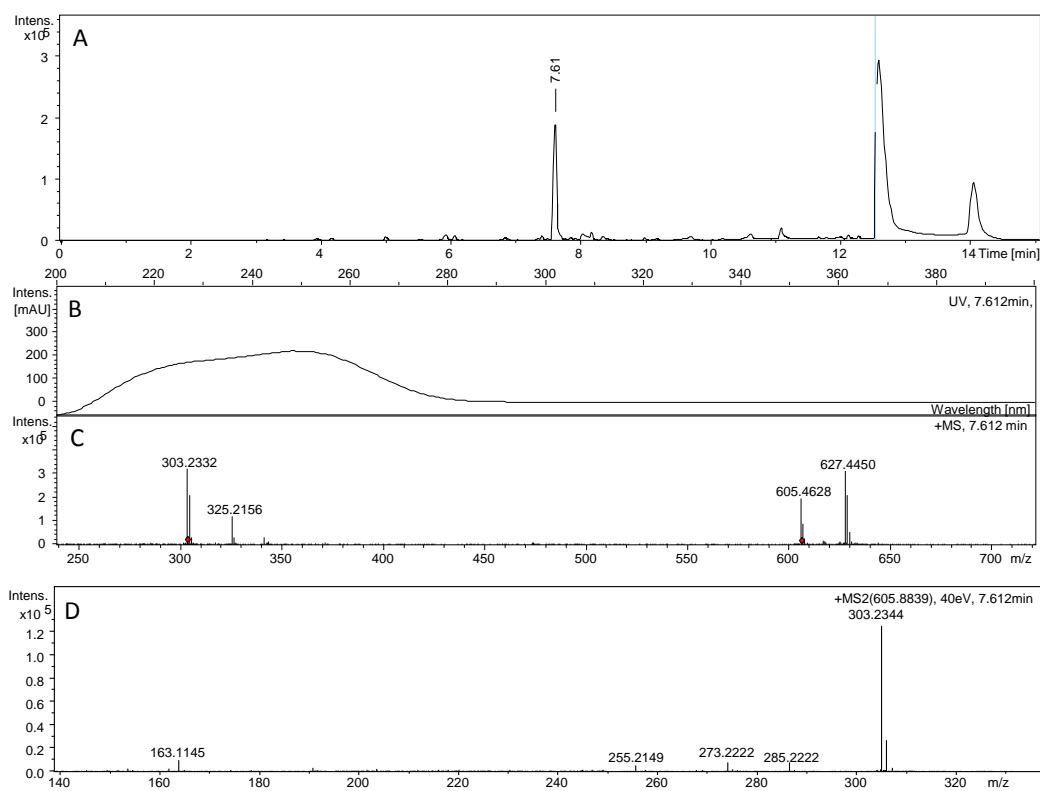

**Figure S9.** +ESI-QqTOF-MS chromatogram (A), UV spectrum (B), +ESI-MS (C) and +ESI-MS2 (D) spectra of compound **2**,  $[\text{M}+\text{H}]^+$ : 303.2346 ( $\text{C}_{20}\text{H}_{31}\text{O}_2$ ). Internal calibrant sodium formate: 12.6 min.

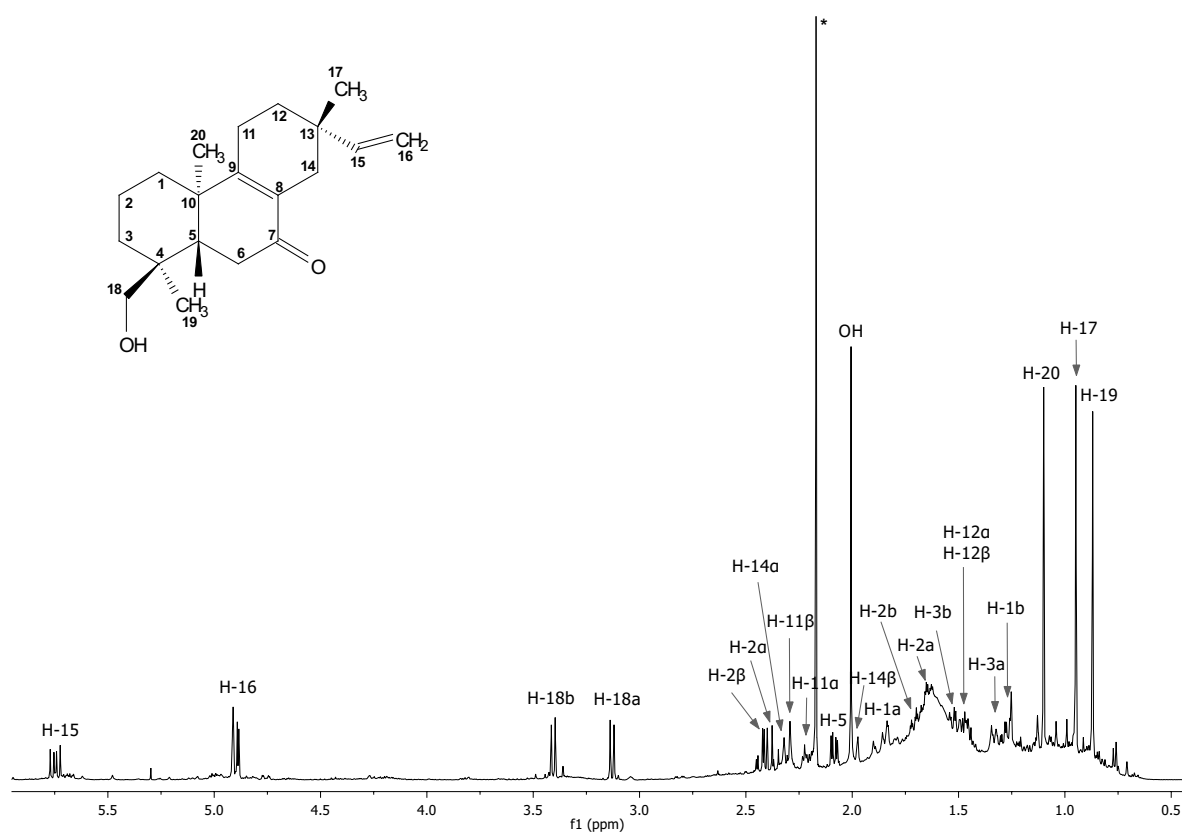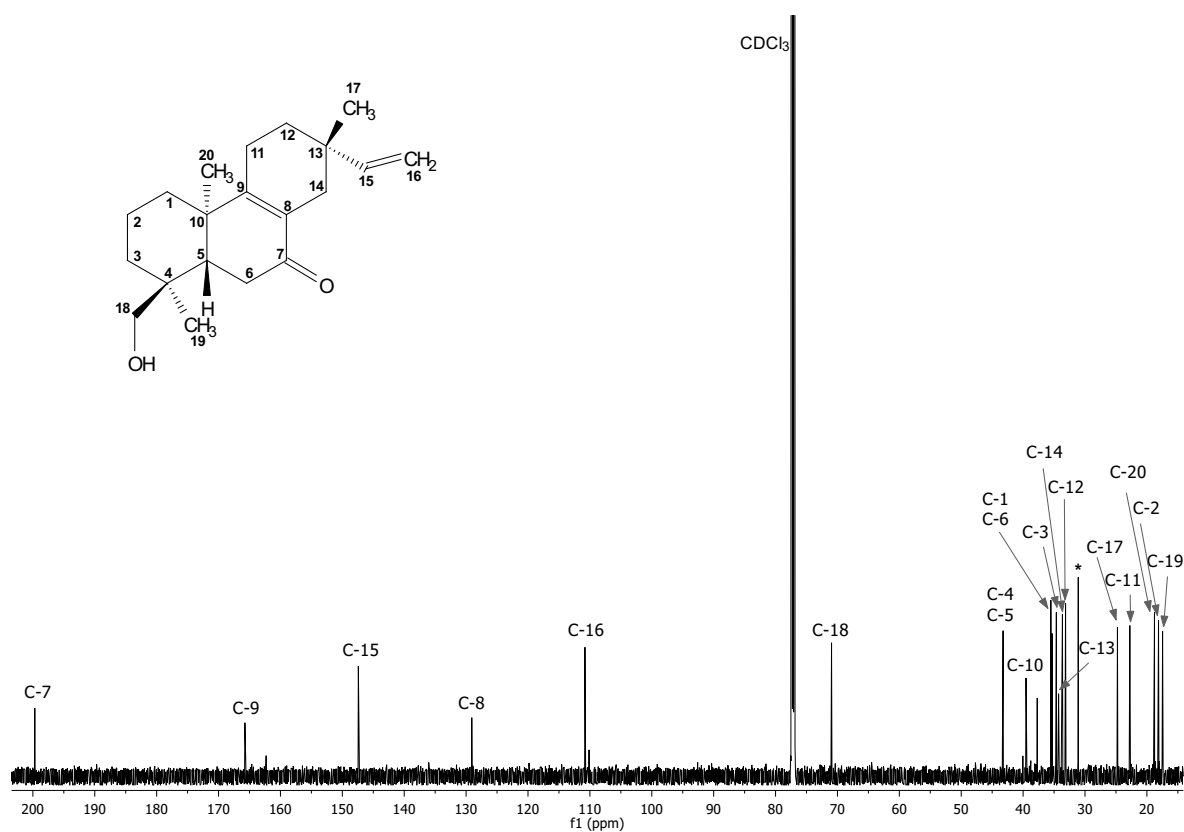

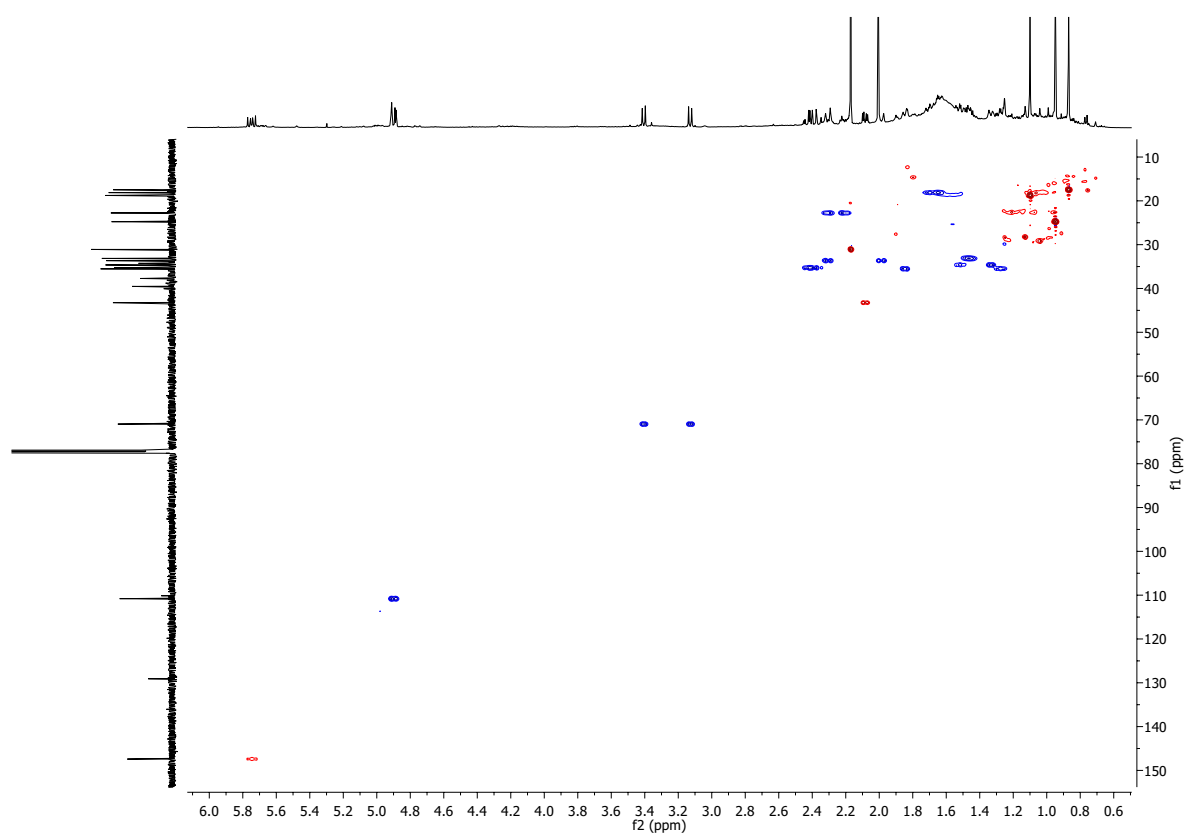

Figure S12.  $^1\text{H}/^{13}\text{C}$ -HSQC spectrum of compound 2 (600/150 MHz,  $\text{CDCl}_3$ ).

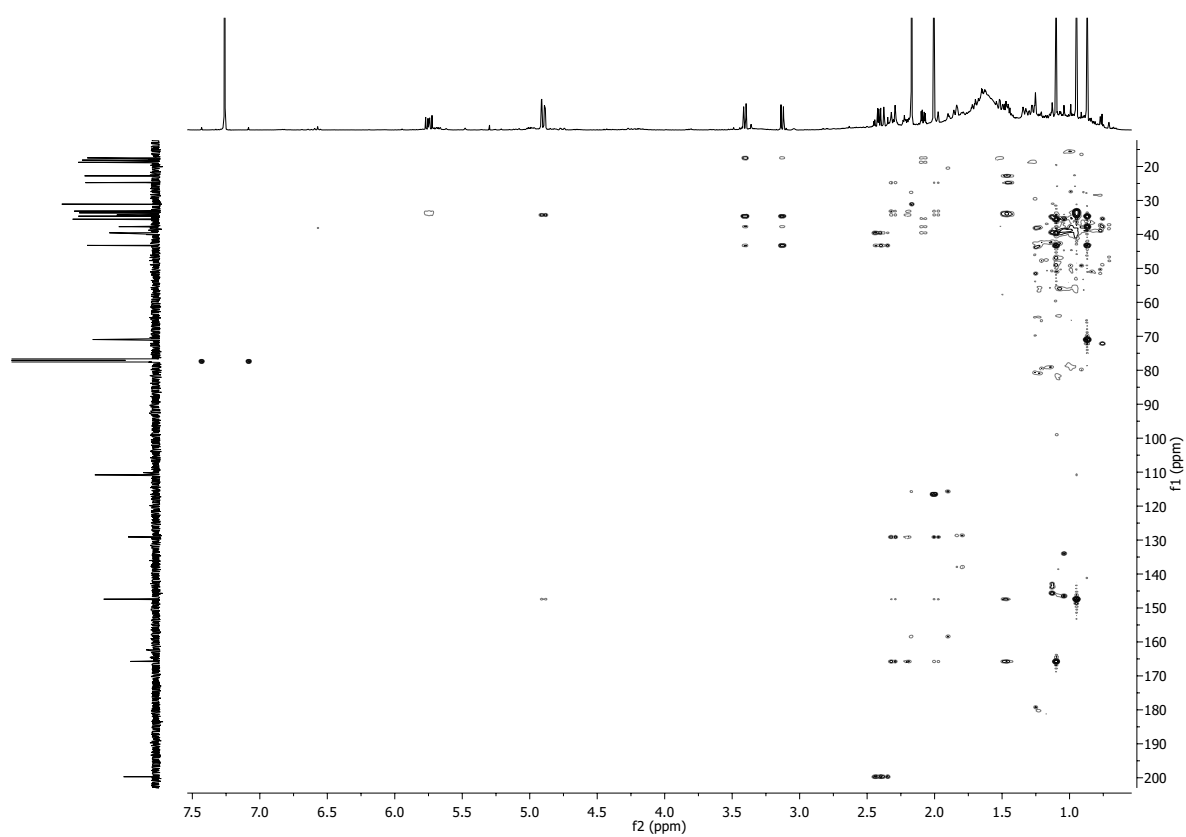

Figure S13.  $^1\text{H}/^{13}\text{C}$ -HMBC spectrum of compound 2 (600/150 MHz,  $\text{CDCl}_3$ ).

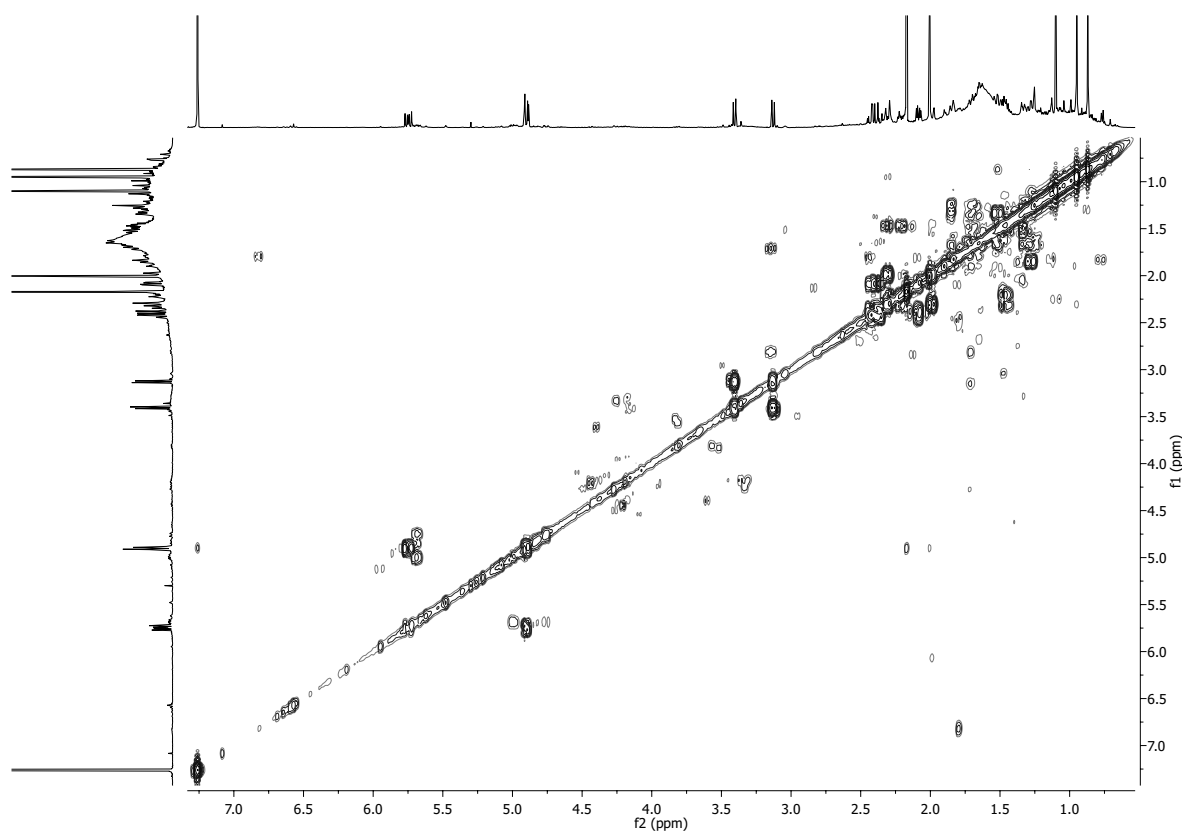

Figure S14.  $^1\text{H}/^1\text{H}$ -COSY spectrum of compound **2** (600 MHz,  $\text{CDCl}_3$ ).

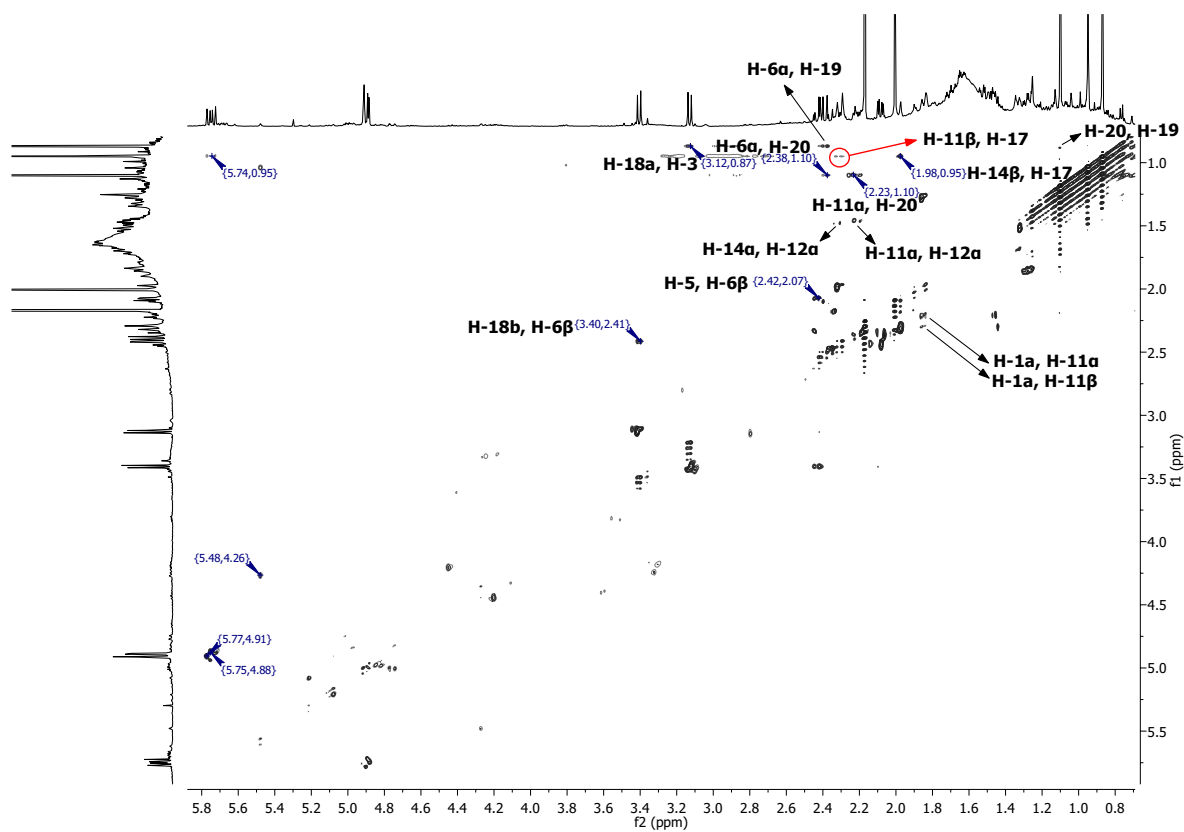

Figure S15.  $^1\text{H}/^1\text{H}$ -NOESY spectrum of compound **2** (600 MHz,  $\text{CDCl}_3$ ). Cross-correlated peak (red circle) enabled the determination of the stereochemistry at C-13.



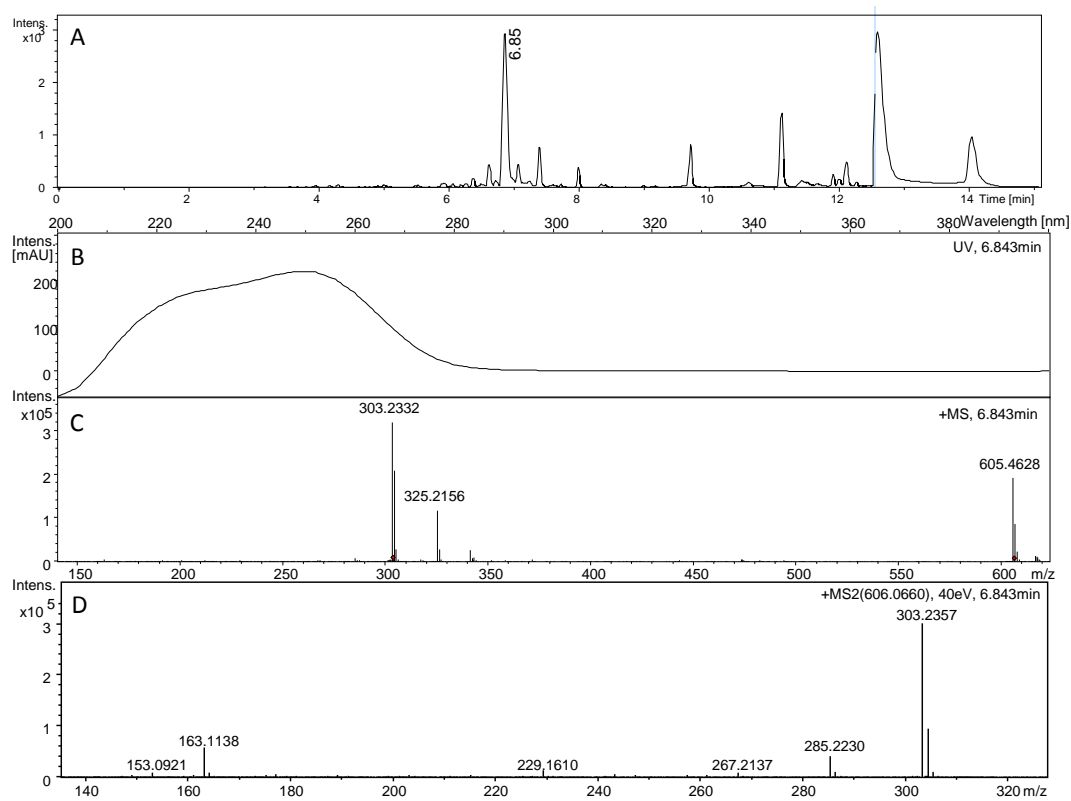

**Figure S16.** +ESI-QqTOF-MS chromatogram (A), UV spectrum (B), +ESI-MS (C) and +ESI-MS2 (D) spectra of compound 3,  $[M+H]^+$ : 303.2332 ( $C_{20}H_{31}O_2$ ). Internal calibrant sodium formiate: 12.6 min.

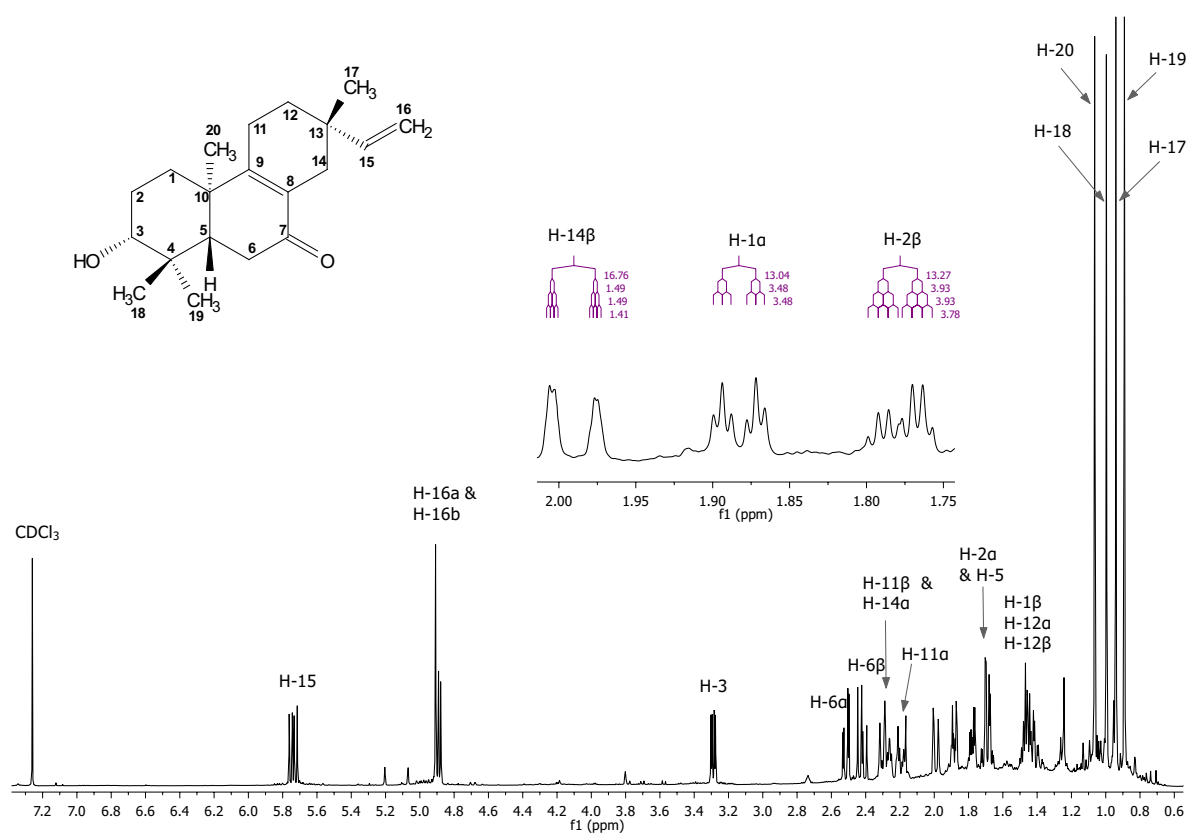

**Figure S17.**  $^1H$  NMR spectrum of compound 3 ( $CDCl_3$ , 600 MHz).

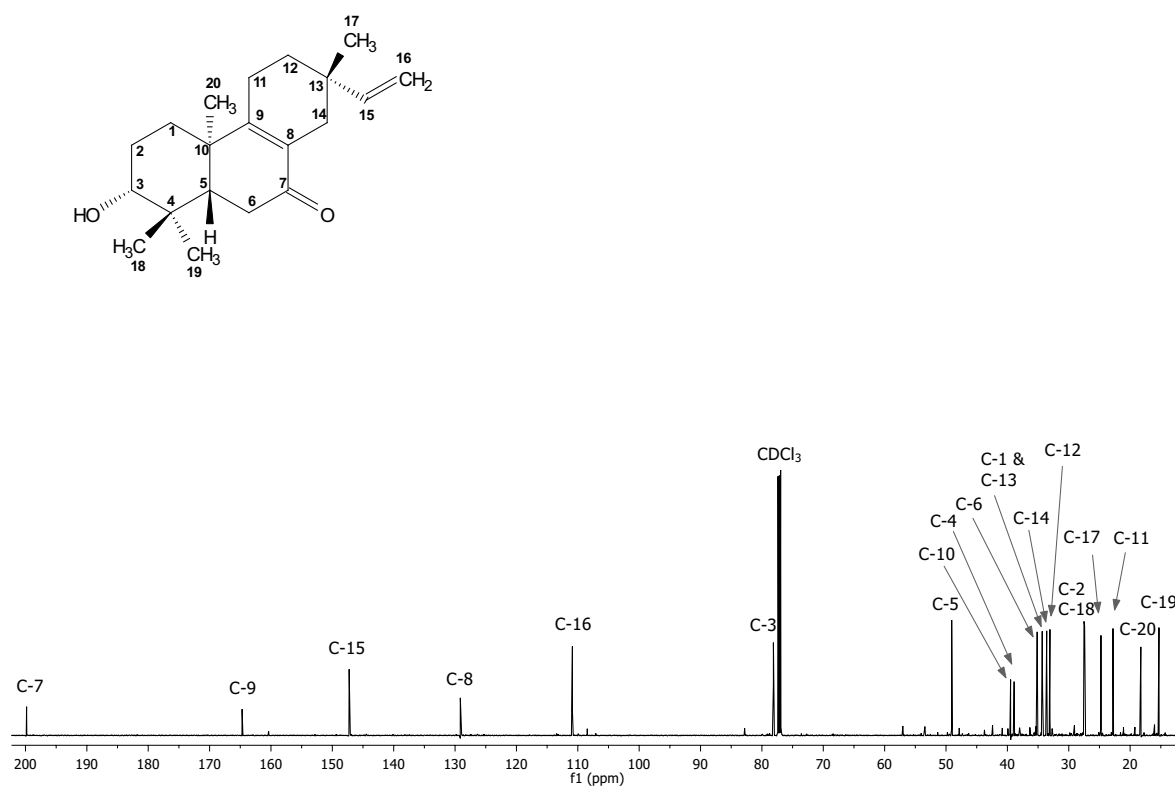

**Figure S18.**  $^{13}\text{C}$  NMR spectrum of compound 3 ( $\text{CDCl}_3$ , 150 MHz).

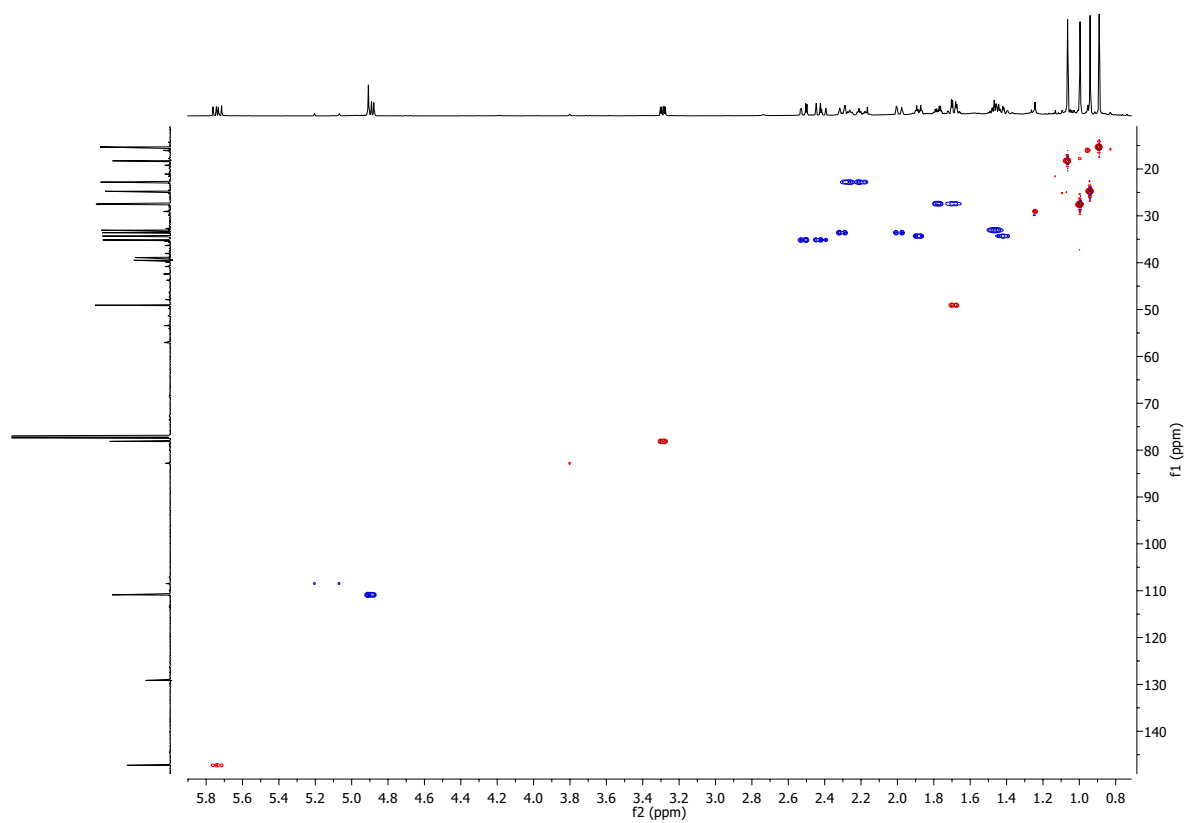

**Figure S19.**  $^1\text{H}/^{13}\text{C}$ -HSQC spectrum of compound 3 (600/150 MHz,  $\text{CDCl}_3$ ).

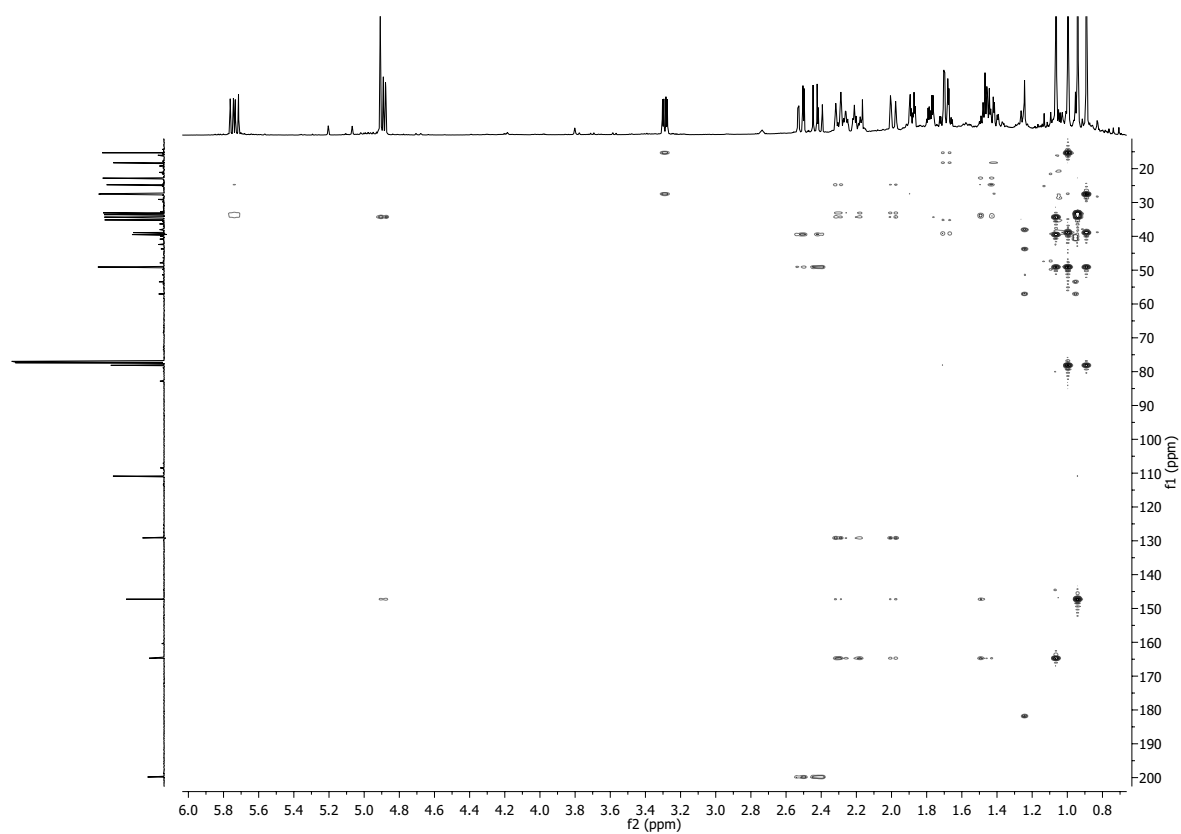

Figure S20.  $^1\text{H}/^{13}\text{C}$ -HMBC spectrum of compound 3 (600/150 MHz,  $\text{CDCl}_3$ ).

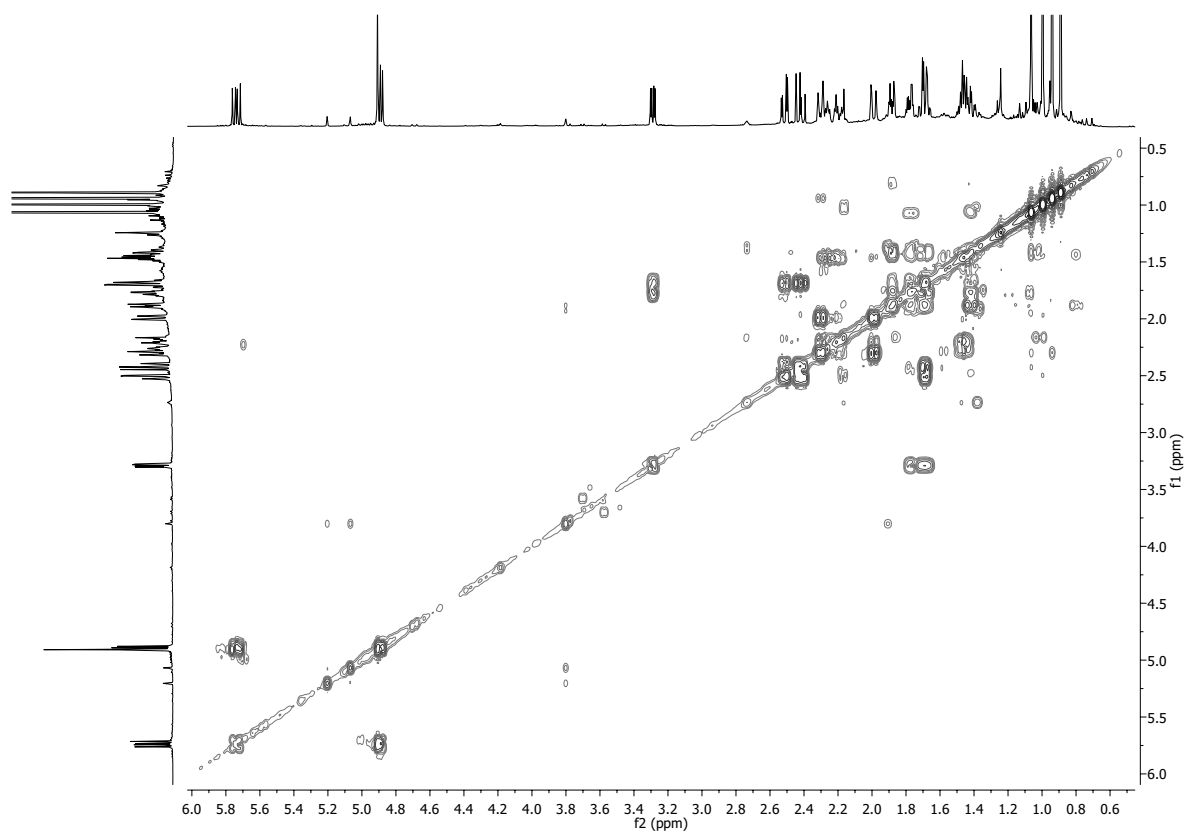

Figure S21.  $^1\text{H}/^1\text{H}$ -COSY spectrum of compound 3 (600 MHz,  $\text{CDCl}_3$ ).

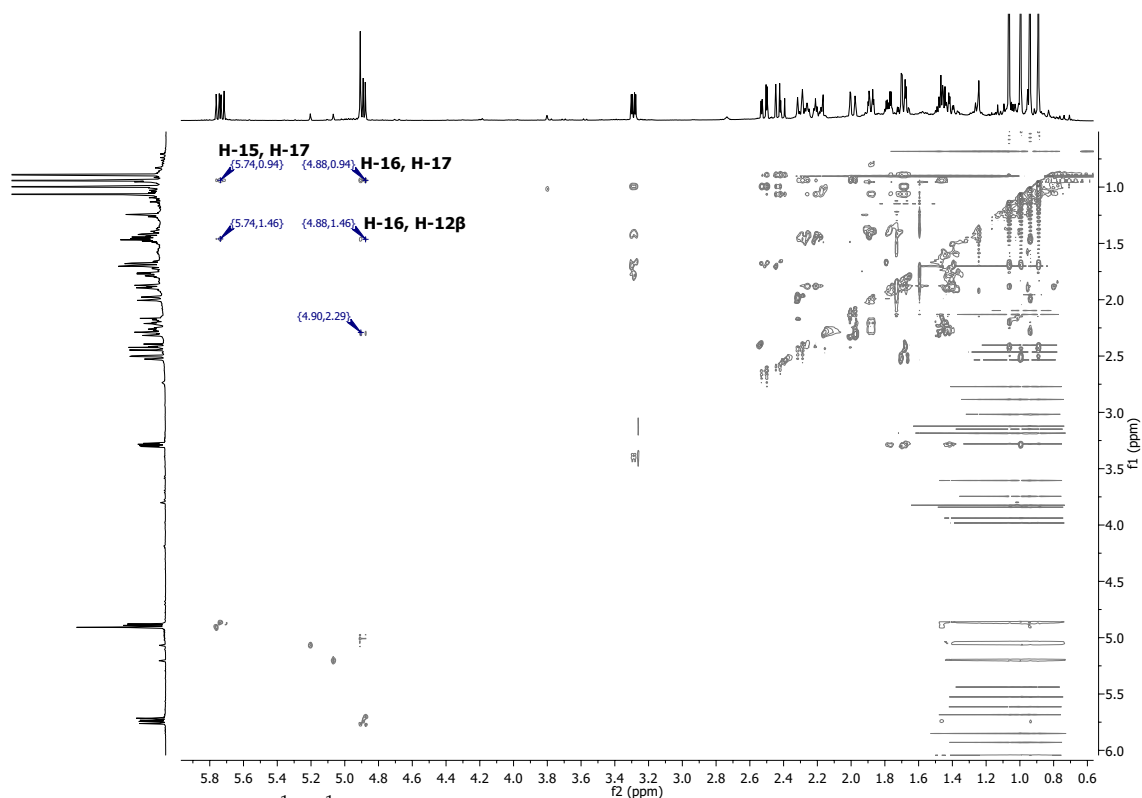

**Figure S22.** Partial  $^1\text{H}/^1\text{H}$ -NOESY spectrum of compound **3** (600 MHz,  $\text{CDCl}_3$ ) highlighting correlations in the downfield region.

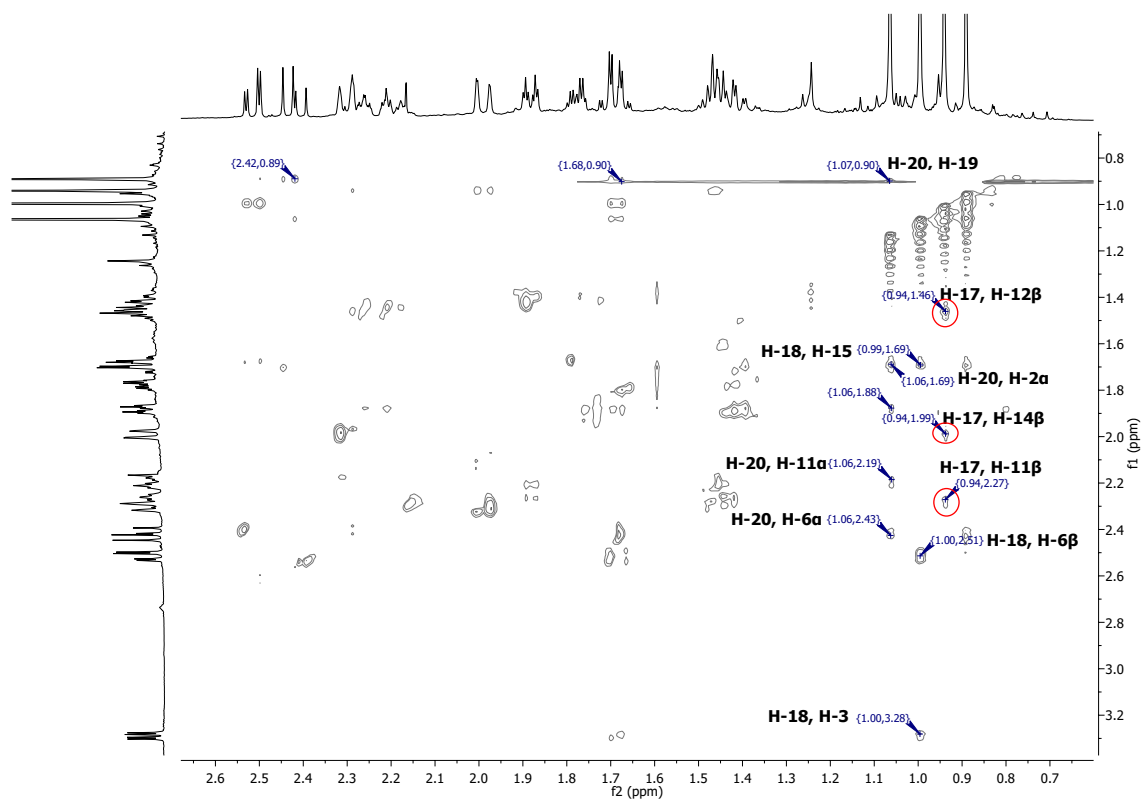

**Figure S23.** Partial  $^1\text{H}/^1\text{H}$ -NOESY spectrum of compound **3** (600 MHz,  $\text{CDCl}_3$ ) showing correlations in the upfield region. Stereochemistry at C-13 in compound **4** is justified by the NOE effects circled in red.

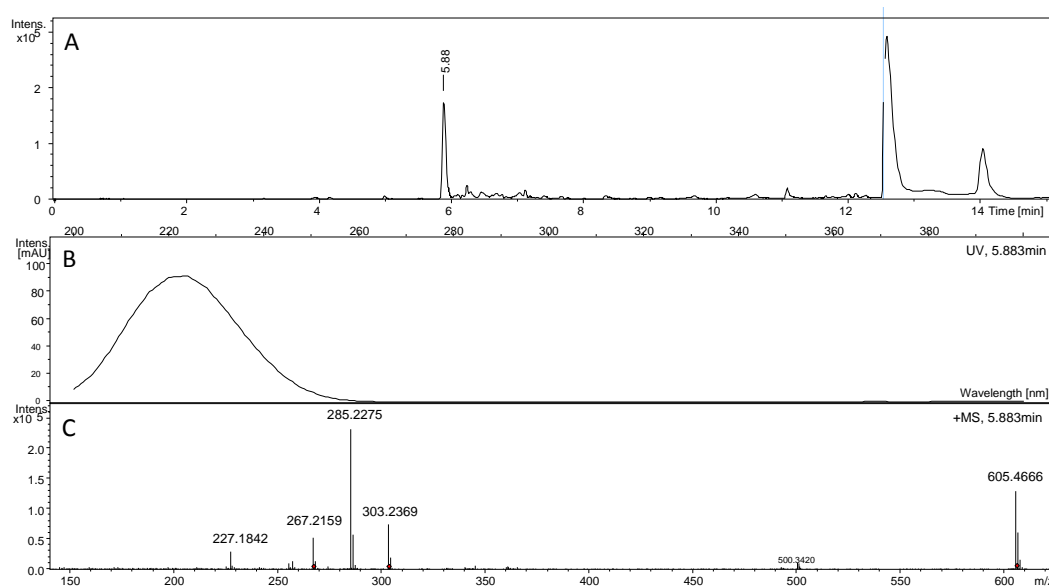

**Figure S24.** +ESI-QqTOF-MS chromatogram (A), UV spectrum (B), +ESI-MS (C) and +ESI-MS2 (D) spectra of compound 4,  $[M+H]^+$ : 303.2369 ( $C_{20}H_{31}O_2$ ). Internal calibrant sodium formate: 12.6 min.

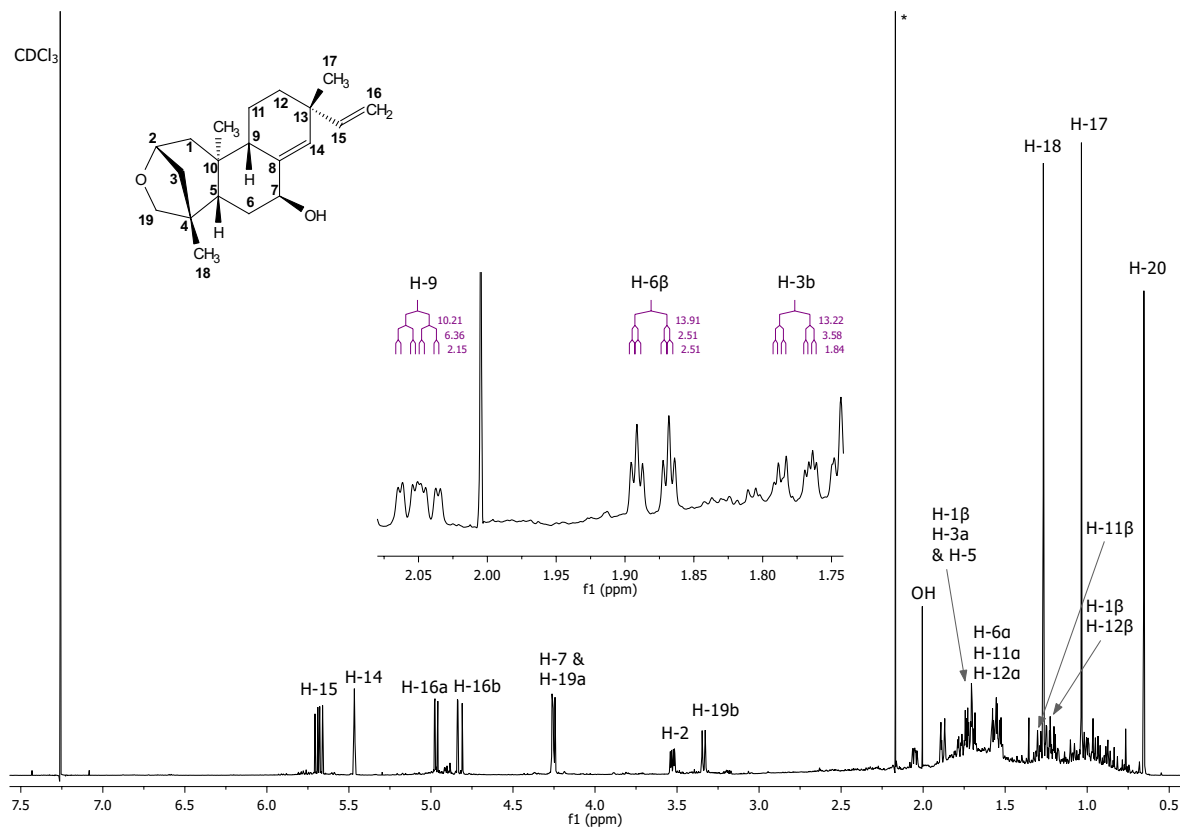

**Figure S25.** <sup>1</sup>H NMR spectrum of compound 4 (CDCl<sub>3</sub>, 600 MHz). \*-CH<sub>3</sub> protons from acetone.

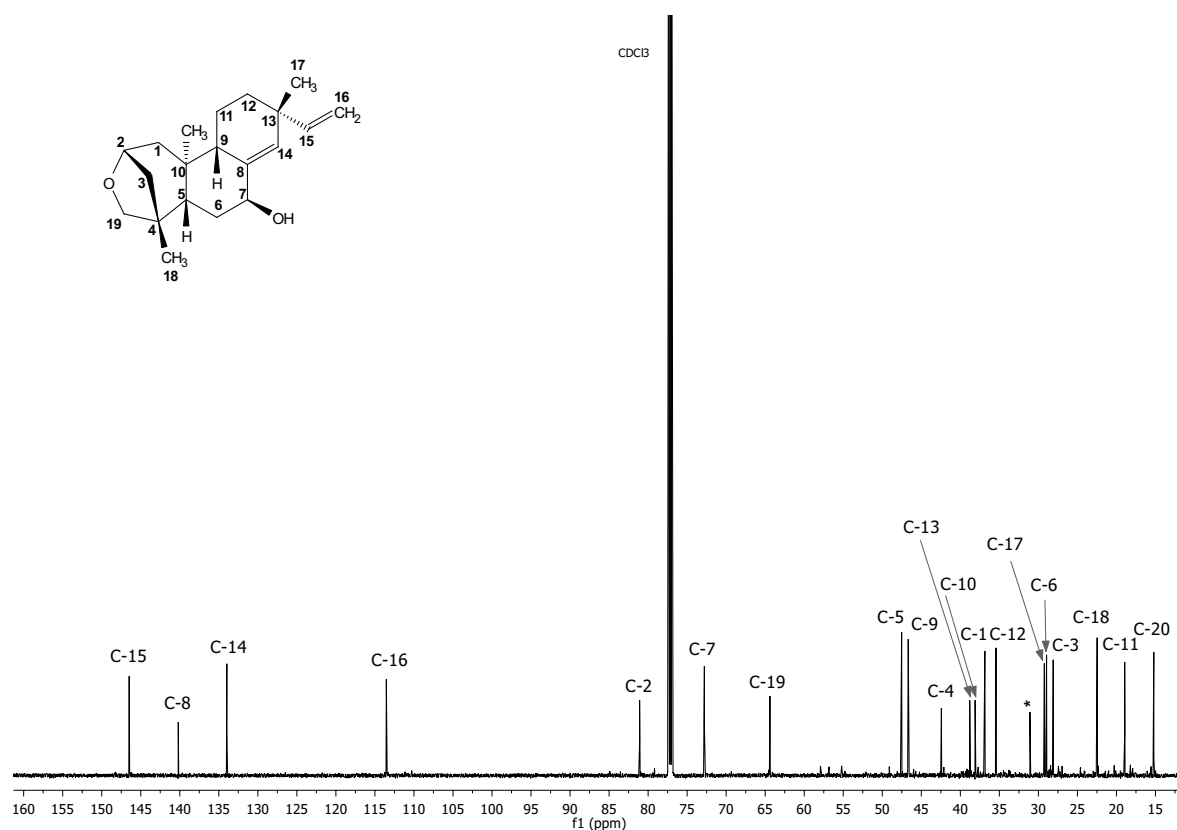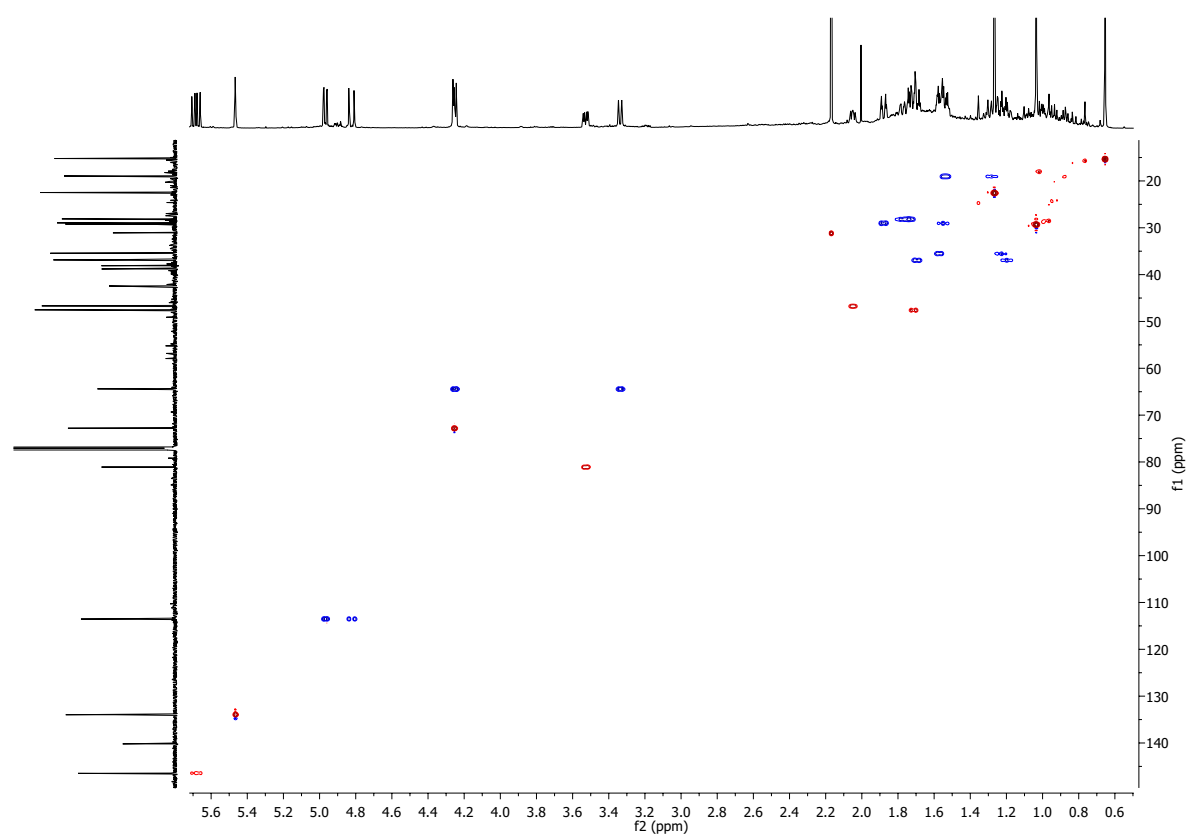

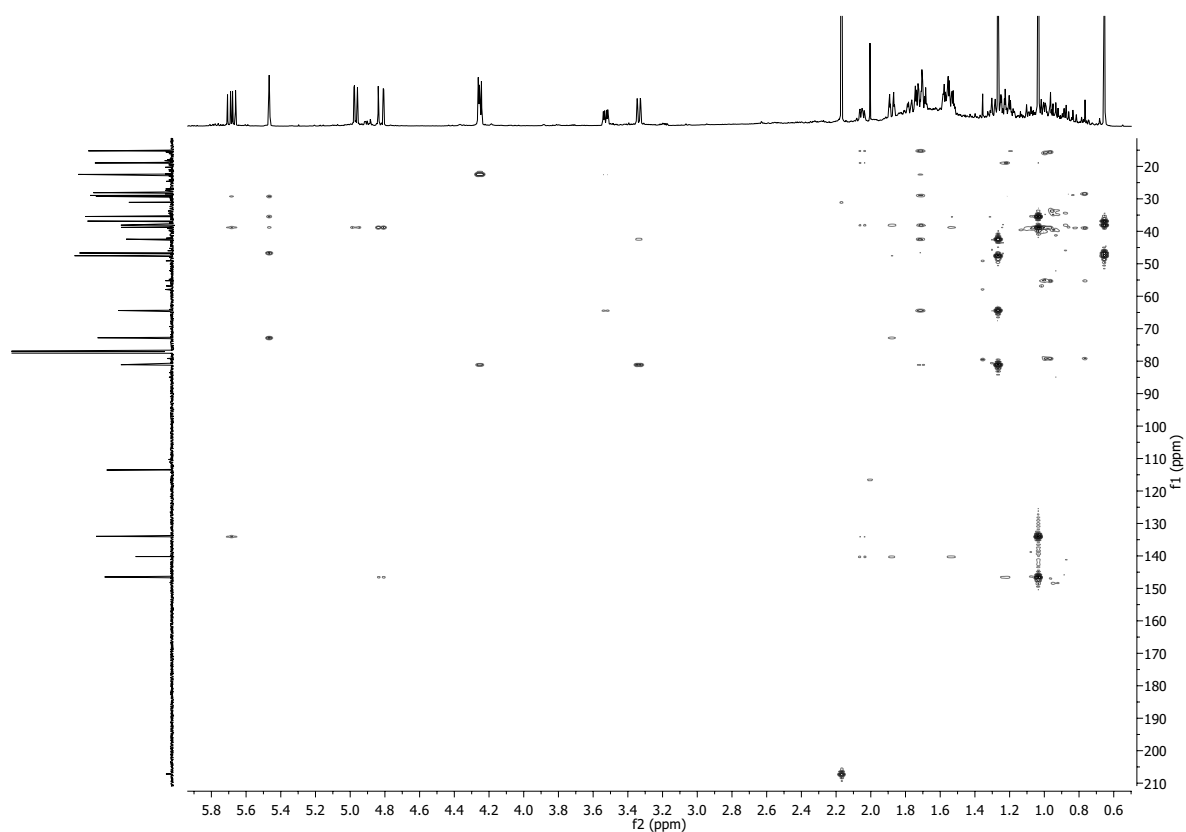

Figure S28.  $^1\text{H}/^{13}\text{C}$ -HMBC spectrum of compound **4** (600/150 MHz,  $\text{CDCl}_3$ ).

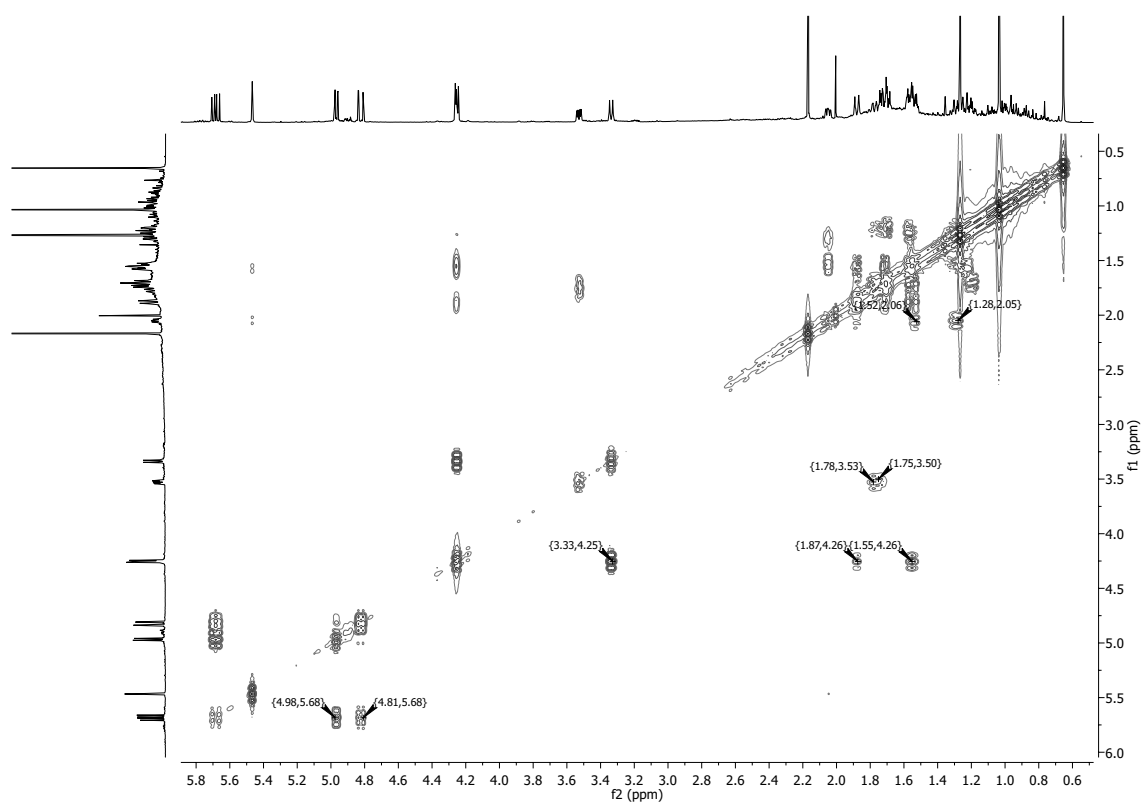

Figure S29.  $^1\text{H}/^1\text{H}$ -COSY spectrum of compound **4** (600 MHz,  $\text{CDCl}_3$ ).

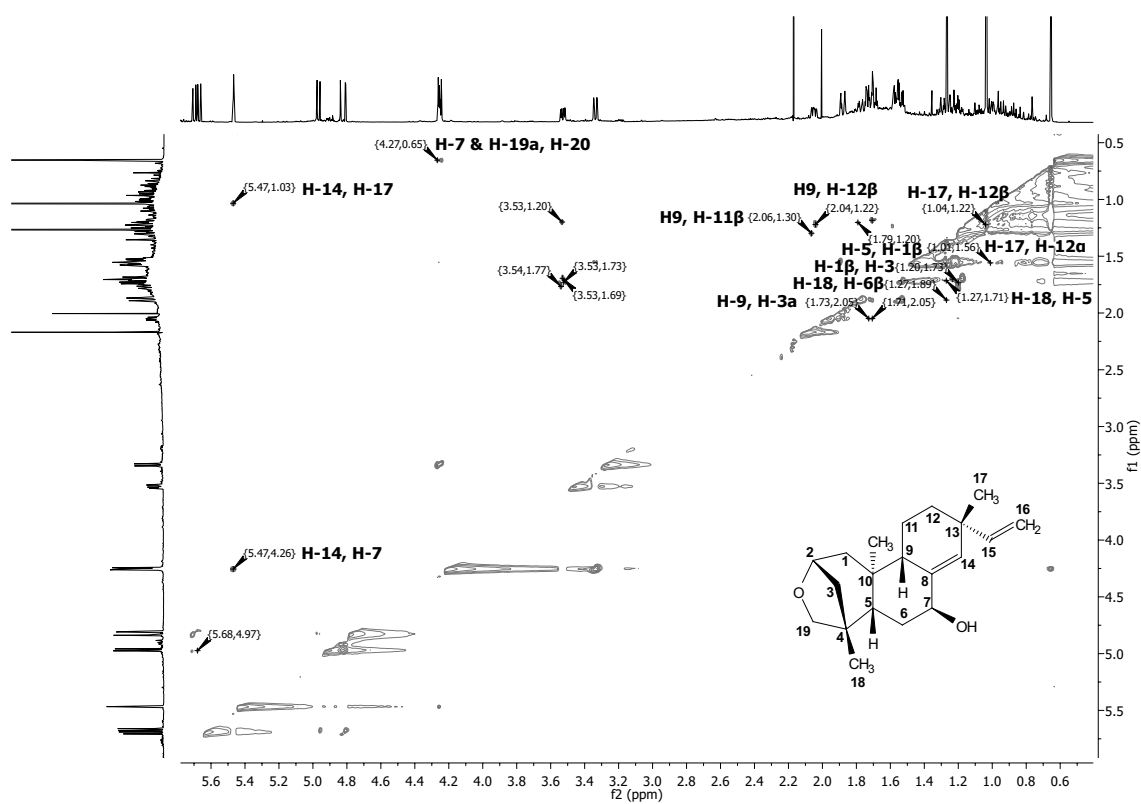

**Figure S30.**  $^1\text{H}/^1\text{H}$ -NOESY spectrum of compound **4** (600 MHz,  $\text{CDCl}_3$ ).
