# Supplementary material for: ent-Pimarane and ent-Kaurane Diterpenes from Aldama discolor (Asteraceae) and Their Antiprotozoal Activity
Source: MDPI journal article supplement (doi:10.3390/molecules21091237), 2016-09-15
Supplement: s2 [file s2]

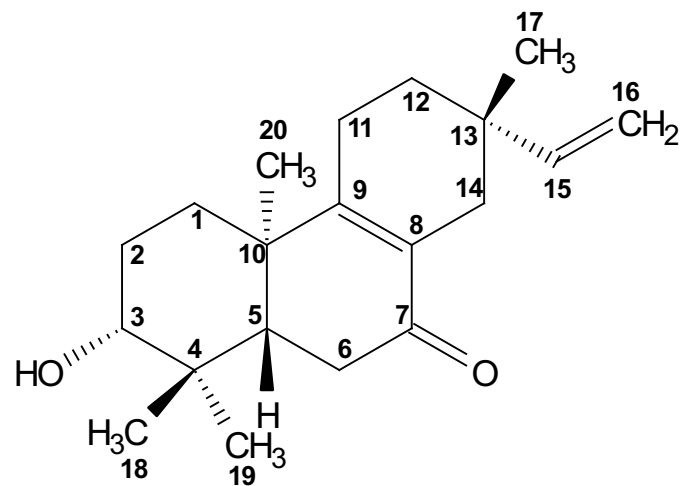

H-14 $\beta$

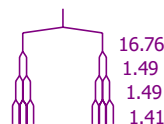

H-1 $\alpha$

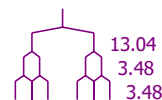

H-2 $\beta$

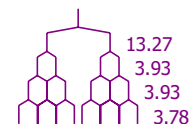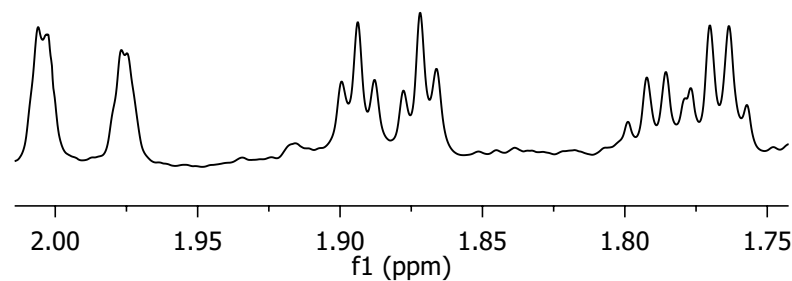

H-20  
H-18

H-19  
H-17

CDCl<sub>3</sub>

H-16a &  
H-16b

H-15

H-3

H-11 $\beta$  &  
H-14 $\alpha$

H-2 $\alpha$  &  
H-5

H-1 $\beta$   
H-12 $\alpha$   
H-12 $\beta$

H-6 $\beta$

H-11 $\alpha$

H-6 $\alpha$

7.2 7.0 6.8 6.6 6.4 6.2 6.0 5.8 5.6 5.4 5.2 5.0 4.8 4.6 4.4 4.2 4.0 3.8 3.6 3.4 3.2 3.0 2.8 2.6 2.4 2.2 2.0 1.8 1.6 1.4 1.2 1.0 0.8 0.6

f1 (ppm)
